1 **Limited variation between SARS-CoV-2-infected individuals in domain specificity and**  
2 **relative potency of the antibody response against the spike glycoprotein**

3

4 Hanora A. Van Ert<sup>1</sup>, Dana W. Bohan<sup>1</sup>, Kai Rogers<sup>1</sup>, Mohammad Fili<sup>2</sup>, Roberth A. Rojas  
5 Chávez<sup>1</sup>, Enya Qing<sup>3</sup>, Changze Han<sup>1</sup>, Spencer Dempewolf<sup>1</sup>, Guiping Hu<sup>2</sup>, Nathan  
6 Schwery<sup>1</sup>, Kristina Sevcik<sup>1</sup>, Natalie Ruggio<sup>1</sup>, Devlin Boyt<sup>1</sup>, Michael A. Pentella<sup>4</sup>, Tom  
7 Gallagher<sup>3</sup>, J. Brooks Jackson<sup>5</sup>, Anna E. Merrill<sup>5</sup>, C. Michael Knudson<sup>5</sup>, Grant D. Brown<sup>6</sup>,  
8 Wendy Maury<sup>1</sup>, and Hillel Haim<sup>1#</sup>

9

10 <sup>1</sup> Department of Microbiology and Immunology, The University of Iowa, Iowa City, IA

11 <sup>2</sup> Department of Industrial and Manufacturing Systems Engineering, Iowa State University,  
12 Ames, IA

13 <sup>3</sup> Department of Microbiology and Immunology, Loyola University Chicago, Maywood, IL

14 <sup>4</sup> State Hygienic Laboratory, The University of Iowa, Iowa City, IA

15 <sup>5</sup> Department of Pathology, University of Iowa Hospitals & Clinics, Iowa City, IA

16 <sup>6</sup> Department of Biostatistics, School of Public Health, The University of Iowa, Iowa City, IA

17

18 # To whom correspondence should be addressed:

19 Hillel Haim, MD, PhD

20 Department of Microbiology and Immunology

21 The University of Iowa

22 51 Newton Rd, 3-770 BSB

23 Iowa City, Iowa, 52242

24 Phone: (319) 335-9989

25 Email: [Hillel-haim@uiowa.edu](mailto:Hillel-haim@uiowa.edu)

26

27 **Short Title:** Variation in antibody responses against SARS-CoV-2

28 **Keywords:** SARS-CoV-2, COVID-19, spike protein, convalescent plasma, antibody  
29 neutralization, immunoassay, immunoglobulins.

30 **Abstract word count:** 250.

31 **Text word count:** 6,975.

## 32 **ABSTRACT**

33           The spike protein of SARS-CoV-2 is arranged as a trimer on the virus surface,  
34 composed of three S1 and three S2 subunits. Infected and vaccinated individuals generate  
35 antibodies against spike, which can neutralize the virus. Most antibodies target the receptor-  
36 binding domain (RBD) and N-terminal domain (NTD) of S1; however, antibodies against other  
37 regions of spike have also been isolated. The variation between infected individuals in domain  
38 specificity of the antibodies and in their relative neutralization efficacy is still poorly  
39 characterized. To this end, we tested serum and plasma samples from 85 COVID-19  
40 convalescent subjects using 7 immunoassays that employ different domains, subunits and  
41 oligomeric forms of spike to capture the antibodies. Samples were also tested for their  
42 neutralization of pseudovirus containing SARS-CoV-2 spike and of replication-competent  
43 SARS-CoV-2. We observed strong correlations between the levels of NTD- and RBD-specific  
44 antibodies, with a fixed ratio of each type to all anti-spike antibodies. The relative potency of the  
45 response (defined as the measured neutralization efficacy relative to the total level of spike-  
46 targeting antibodies) also exhibited limited variation between subjects, and was not associated  
47 with the overall amount of anti-spike antibodies produced. Accordingly, the ability of  
48 immunoassays that use RBD, NTD and different forms of S1 or S1/S2 as capture antigens to  
49 estimate the neutralizing efficacy of convalescent samples was largely similar. These studies  
50 suggest that host-to-host variation in the polyclonal response elicited against SARS-CoV-2  
51 spike is primarily limited to the quantity of antibodies generated rather than their domain  
52 specificity or relative neutralization potency.

53 **IMPORTANCE**

54 Infection by SARS-CoV-2 elicits antibodies against various domains of the spike protein,  
55 including the RBD, NTD and S2. Different infected individuals generate vastly different amounts  
56 of anti-spike antibodies. By contrast, as we show here, there is a remarkable similarity in the  
57 properties of the antibodies produced. Different individuals generate the same proportions of  
58 antibodies against each domain of the spike protein. Furthermore, the relationship between the  
59 amount of anti-spike antibodies produced and their neutralization efficacy of SARS-CoV-2 is  
60 highly conserved. Therefore, the observed variation in the neutralizing activity of the antibody  
61 response in COVID-19 convalescent subjects is caused by differences in the amounts of  
62 antibodies rather than their recognition properties or relative antiviral activity. These findings  
63 suggest that COVID-19 vaccine strategies that focus on enhancing the overall level of the  
64 antibodies will likely elicit a more uniformly efficacious protective response.

## 65 INTRODUCTION

66 The spike protein on the surface of SARS-CoV-2 mediates fusion with target cells (1, 2).  
67 Spike is generated as a precursor that is cleaved by furin in the producer cells to generate S1  
68 and S2 subunits (3). These subunits are non-covalently associated on the virus surface, where  
69 they form a trimer of heterodimers (4). Furin cleavage primes spike for further processing by the  
70 serine protease TMPRSS2 on the plasma membrane or the cysteine protease cathepsin L  
71 within the endosome (3, 5, 6). Spike is highly immunogenic in humans and, in infected and  
72 vaccinated individuals, readily elicits antibodies that play a critical role in protection (7, 8). Most  
73 neutralizing antibodies isolated to date target the receptor-binding domain (RBD) on the S1  
74 subunit (9-15). In addition, multiple neutralizing antibodies that target the N-terminal domain  
75 (NTD) of S1 have been isolated (16-18). By contrast, neutralizing antibodies against the C-  
76 terminal domain (CTD) of S1 or against the S2 subunit are relatively rare (19, 20). The variation  
77 between individuals in the domain specificity of the anti-spike response and in the relative  
78 neutralization efficacy of the antibodies produced remains poorly explored.

79 To address this question, we quantified the binding specificity of anti-spike antibodies in  
80 85 convalescent COVID-19 serum and plasma samples using capture antigens that represent  
81 different domains, subunits, and oligomeric forms of spike. A panel of 7 in-house and  
82 commercial immunoassays that quantify anti-spike antibodies was tested, as well as a  
83 nucleocapsid-based assay. Antibody content in the samples measured by these assays was  
84 compared with their neutralization efficacy of SARS-CoV-2. We observed that different subjects  
85 exhibit remarkably similar ratios of anti-RBD and anti-NTD antibodies relative to the total anti-  
86 spike antibodies. Interestingly, the relative potency of the convalescent samples (defined as the  
87 ratio between neutralization efficacy and the amount of anti-spike antibodies measured) was  
88 also similar in different individuals, and was not associated with the robustness of the response  
89 against spike. Our results demonstrate limited host-to-host variation in both spike domain

90 specificity and in the relative potency of the antibody response elicited after SARS-CoV-2  
91 infection. Variation between hosts in the polyclonal response generated is primarily limited to  
92 the quantity of the antibodies rather than the domains targeted or the efficacy of their  
93 neutralizing activity.

94

## 95 **RESULTS**

### 96 **Strong correlations between results of immunoassays that apply different spike** 97 **components as the capture antigen**

98 To determine the target specificity of the SARS-CoV-2 antibody response, we analyzed  
99 serum and plasma samples collected from individuals who had recovered from COVID-19 (see  
100 all donor information in **Supp. Table S1**). Serum samples were obtained from individuals willing  
101 to donate convalescent plasma for the treatment of COVID-19 patients. In addition, we analyzed  
102 plasma samples from obstetric patients who had serologic evidence of COVID-19 infection;  
103 samples were collected during their hospitalization for delivery (21). All samples were collected  
104 between March 2020 and January 2021. None of the donors required hospitalization for COVID-  
105 19-related symptoms. For 68% of donors, the precise date of positivity for SARS-CoV-2 (by  
106 PCR analysis of a nasopharyngeal swab) was known; among these subjects, 82% of the serum  
107 or plasma samples were collected within 60 days of the positive PCR result (**Supp. Fig. S1A**).  
108 For each serum or plasma sample, we quantified the levels of SARS-CoV-2-specific antibodies  
109 using commercially-available and in-house-developed immunoassays that apply different  
110 domains, subunits or oligomeric forms of the spike protein as the capture antigen (**Table 1** and  
111 **Fig. 1A**). To mimic the native spike trimer on the virus surface, we used a cell-based enzyme  
112 linked immunosorbent assay (cbELISA) that measures antibodies against the full-length  
113 membrane-bound form of spike (22-24). For this purpose, we used human osteosarcoma (HOS)

114 cells that express on their surface fusion-competent spike trimers by transfection with an  
115 expression plasmid that encodes the full-length protein. Samples were also tested by ELISAs, in  
116 which recombinant soluble dimeric forms of the RBD, NTD or the complete ectodomain of  
117 S1/S2 (designated Ecto) were used as the capture antigens. The Ecto protein was generated by  
118 abrogating the furin cleavage site at spike positions 682-685 (3). Binding of antibodies in serum  
119 or plasma to these antigens was measured using a secondary antibody specific for the human  
120 kappa light chain, which detects isotypes IgG, IgM and IgA. In addition, we tested the samples  
121 with commercial immunoassays that detect IgG against the S1 subunit (Ortho Vitros), S1/S2  
122 subunits (DiaSorin Liaison IgG) and a trimeric soluble form of S1/S2 (DiaSorin TrimericS IgG).  
123 To quantify non-spike-targeting antibodies elicited against SARS-CoV-2, we used the Roche  
124 assay that measures total antibodies against the nucleocapsid protein of SARS-CoV-2. Given  
125 that our study focused on quantitative relationships between antibody levels and neutralization  
126 efficacies, we excluded from the analyses all samples that were negative for SARS-CoV-2  
127 antibodies in at least 5 of the 8 immunoassays. Our final test set was composed of 85 samples  
128 (57 serum and 28 plasma). The Ortho test was only performed with the 57 serum samples due  
129 to assay incompatibility with plasma.

130         The RBD, NTD and Ecto ELISAs, as well as cbELISA showed a normal distribution of  
131 their  $\log_{10}$ -transformed values (see **Fig. 1B** and results of a Shapiro-Wilk test in **Supp. Fig.**  
132 **S1B**). The  $\log_{10}$ -transformed values of the Liaison and TrimericS tests were also normally  
133 distributed, whereas the Roche test showed no evidence for normality (**Supp. Fig. S1B** and  
134 **S1C**). We compared values measured in the different assays using the non-parametric  
135 Spearman rank test. Strong correlations were observed between values measured in the  
136 assays that apply different spike components as the capture antigens, whereas correlations with  
137 the nucleocapsid-based Roche assay were less strong (**Fig. 1C** and **Supp. Fig. S2**).

138 Interestingly, a strong association was observed between the content of antibodies against the  
139 non-overlapping NTD and RBD of spike (**Fig. 1D**).

140 Previous studies have suggested that the majority of spike-targeting antibodies elicited  
141 after infection or vaccination target the RBD and NTD, whereas antibodies that target the CTD  
142 and S2 are less common (25, 26). We used our in-house ELISA assays to determine the  
143 relative amounts of antibodies against the RBD and NTD of spike. Since equimolar  
144 concentrations of the NTD, RBD and Ecto proteins were used for capture in our ELISAs, we first  
145 compared for each sample the sum of the ELISA values measured in the RBD and NTD assays  
146 with the value measured for Ecto. We observed that for each sample, the sum of the NTD and  
147 RBD values was comparable to that of Ecto, indicating that antibodies against the NTD and  
148 RBD account for the vast majority of all S1/S2-targeting antibodies (**Fig. 1E**). We further  
149 compared the level of antibodies that target the RBD and NTD by calculating for each patient  
150 the ratio between the values in these assays. Greater binding activity to the RBD than NTD was  
151 observed, with a mean RBD-to-NTD ratio of 1.8 and standard deviation of 0.99 (**Fig. 1F**). Thus,  
152 the ratio of RBD-to-NTD antibodies was relatively constant in different subjects, ranging  
153 between 1 and 3 in 78% of cases. Only 2% of the samples showed two-fold or higher binding to  
154 the NTD, and only 8% of the samples showed more than 3-fold higher binding to the RBD. The  
155 proportion of RBD- or NTD-targeting antibodies (relative to all spike-targeting antibodies) did not  
156 vary with the interval between infection and the time of sample collection (**Supp. Fig. S3**).

157 Therefore, the levels of antibodies elicited against the RBD and NTD are highly  
158 correlated. Antibodies targeting the two domains exhibit a relatively constant relationship and  
159 account for the vast majority of all anti-spike antibodies elicited.

160

161 **Different domains, subunits and oligomeric forms of spike show similar abilities to**  
162 **estimate the neutralization efficacy of COVID-19 convalescent samples**

163 Neutralizing antibodies mainly target the RBD and NTD of spike (9, 16, 17). Previous  
164 studies have shown that the levels of antibodies against different forms of spike (including S1,  
165 S1/S2 and RBD) correlate well with the neutralization capacity of the samples (27-31). However,  
166 the relationship between the neutralization activity of the polyclonal response in each individual  
167 and its domain specificity, as well as the variation in this relationship between different hosts are  
168 still poorly characterized. To address these questions, we compared the neutralization efficacy  
169 of the convalescent samples and their binding to the capture antigens that represent different  
170 domains and forms of spike. To quantify neutralization, we first used a replication-defective  
171 pseudovirus that contains the spike protein of SARS-CoV-2. For this purpose, we generated  
172 vesicular stomatitis virus (VSV) pseudovirions that encode the firefly luciferase gene in place of  
173 the native VSV-G glycoprotein gene and are pseudotyped with SARS-CoV-2 spike (VSV-  
174 SARS2-S) (5, 32). Residual infectivity of the pseudovirus in the presence of sera was measured  
175 using Vero-E6 target cells. The calculated dilution of sera at which virus infectivity was reduced  
176 two-fold is reported as the  $IC_{50}$  value. The  $\log_{10}$ -transformed  $IC_{50}$  values were consistent with a  
177 normal distribution ( $P$  value = 0.329 in a Shapiro-Wilk test), with a median  $IC_{50}$  corresponding to  
178 a dilution of 1:914 (**Fig. 2A**). Immunoassay values from each of the 8 tests were compared with  
179 the measured  $IC_{50}$  values (**Fig. 2B**). As expected, strong correlations were observed for all  
180 spike-based assays, as determined by the Spearman rank correlation coefficient, with  $P$  values  
181 lower than 0.000002 for all assays other than the nucleocapsid-based Roche test (**Fig. 2C**).  
182 These findings correspond with previous studies, which showed that spike-based  
183 immunoassays exhibit better correlations with  $IC_{50}$  values than the nucleocapsid-based Roche  
184 assay (33-35).



185           While there is a clear relationship between immunoassay values and neutralization  
186           efficacies in all comparisons, our primary question concerned the relative balance of these two  
187           factors in each assay, requiring a different metric. To better assess the relative abilities of the  
188           different capture antigens to estimate neutralization efficacies of the donor samples we used the  
189           precision metric. Precision was calculated by the ratio between the number of samples that are  
190           positive for neutralization at the selected threshold and the number of samples that are positive  
191           for SARS-CoV-2 antibodies by their immunoassay values. The level of precision was  
192           determined for subsets of the samples with progressively higher immunoassay thresholds for  
193           inclusion; from the 0<sup>th</sup> percentile (all samples are included in the test) to the 98<sup>th</sup> percentile (only  
194           samples with the top 2% of immunoassay values are included). Specific thresholds for  
195           neutralization were tested first, whereby a sample was considered neutralization-positive if the  
196           IC<sub>50</sub> value was greater than a dilution of 1:500 or 1:2,000 (**Fig. 3A**). As expected, the use of  
197           samples from higher immunoassay percentiles resulted in higher precision. Differences between  
198           the immunoassays were more pronounced when the high neutralization threshold (1:2,000) was  
199           set. At this threshold, precision of the nucleocapsid-based Roche assay was low. Surprisingly,  
200           the cbELISA, which measures binding of antibodies to the native membrane-associated form of  
201           spike, also exhibited lower precision than other spike-based assays.

202           Given that performance of the assays can vary at each neutralization threshold, we  
203           sought to generate a metric that would describe performance across a range of neutralization  
204           thresholds. To this end, we first calculated for each threshold (from 1:500 to 1:2,500) the  
205           minimal immunoassay percentile required to achieve a precision level of 0.9 (see boundary line  
206           for Ecto ELISA as example in **Fig. 3B** and all assays in **Supp. Fig. S4**). The area above the  
207           boundary line indicates the percentile-threshold combinations that yield a precision of 0.9 or  
208           higher, which allows us to compare overall performance characteristics between  
209           immunoassays; the greater the area, the higher the ability of the assay to predict neutralization

210 across all IC<sub>50</sub> thresholds. The highest performance was observed for the Ortho, Liaison, Ecto  
211 and RBD assays, followed by NTD, TrimericS and cbELISA (**Fig. 3C**). Since the Roche assay  
212 did not achieve a precision of 0.9, the areas above the curve could not be computed. We then  
213 calculated the area above the curve when the required precision was set at levels ranging  
214 between 0.75 and 0.95. For most precision requirement levels in this range, the lowest  
215 performance was observed for the Roche assay, followed by cELISA, with modestly better  
216 performance for the TrimericS and NTD (**Fig. 3D**). All other assays exhibited similar  
217 performance across the different precision requirements. To determine statistical significance of  
218 the differences between performance of any two assays, we performed a permutation-based  
219 test (see Materials and Methods section). Briefly, for each pair of assays compared, we  
220 measured the area above the curve and calculated the difference. We then permuted for each  
221 patient sample the immunoassay identifiers, the area above the curve was recalculated for both  
222 immunoassays and the difference determined. The fraction of the times the difference was  
223 greater using the permuted values relative to the unpermuted values was calculated as the *P*  
224 value. Significant differences for a one-sided test (*P* values lower than 0.05) were observed  
225 between the cbELISA and all other spike-based assays. The NTD and TrimericS assays  
226 showed moderate differences from other assays; however, they were not significant at the 95%  
227 confidence level (**Fig. 3E**). Therefore, the ability of cbELISA (i.e., the full-length membrane-  
228 bound form of spike) to predict neutralization was significantly lower than that of all other assays  
229 that apply isolated domains of the protein as capture antigens.

230 To independently validate the above findings, we also measured neutralization titers for  
231 24 of the serum samples using infectious SARS-CoV-2 under BSL-3 conditions, and correlated  
232 those findings with immunoassays values. Virus-induced cytopathology was used to detect  
233 infection. The dilution of serum at which cytopathic effects were observed in fewer than 50% of  
234 the wells was determined, and data were fit to a regression model to calculate the precise IC<sub>50</sub>

235 value. For three of the samples, the  $IC_{50}$  was not achieved at the lowest dilution of the serum  
236 used (1:40); the remainder showed a range of  $IC_{50}$  values, with a median dilution of 1:212 (**Fig.**  
237 **4A**). A strong correlation was observed between the neutralization titers of the sera measured  
238 using the replicative SARS-CoV-2 and the VSV-based pseudovirus that contains the spike  
239 protein (**Fig. 4B**). As expected,  $IC_{50}$  values in the pseudovirus assay were higher than those  
240 measured using infectious virus, since the former measures the dilution at which 50% of virus  
241 infectivity is reduced whereas the latter assay measures the dilution at which more than 50% of  
242 wells show complete neutralization of all input virus.

243 We compared immunoassay values of the samples with their neutralization efficacies of  
244 replicative SARS-CoV-2 (**Fig. 4C**). Strong correlations were observed for all spike-based assays  
245 (**Supp. Fig. S5**). Precision analyses using an  $IC_{50}$  threshold of 1:400 demonstrated  
246 considerable differences between performance of the assays (**Fig. 4D**). Comparison of the  
247 overall performance of the immunoassays across neutralization thresholds of 1:50 to 1:500  
248 (using the area above the curve metric with a required precision of 0.9) showed a similar pattern  
249 to the pseudovirus-based measurements (compare **Fig. 4E** and **Fig. 3C**); the poorest  
250 performance was observed for the Roche assay, followed by NTD and cbELISA. All other  
251 assays performed similarly well. Comparison of assay performance at precision levels of 0.75-  
252 0.95 showed modest differences between cbELISA or NTD and all other spike-based assays  
253 (**Fig. 4F**); however, these differences did not reach a significance level of 0.05 (**Fig. 4G**)

254 Taken together, these results demonstrate that performance of immunoassays based on  
255 RBD, S1, or monomeric and dimeric forms of S1/S2 to estimate the neutralization efficacy of  
256 each sample was similar. Modestly lower predictive capacities are observed when NTD and the  
257 full-length form of spike (as measured by cbELISA) are used as the capture antigens. Further,  
258 comparison of the precision of the immunoassays to predict neutralization using pseudovirions  
259 containing SARS-CoV-2 spike or replication-competent viruses yield roughly similar findings.

260

261 **COVID-19 convalescent samples exhibit a similar level of relative neutralization potency**

262 The above results show that different forms of spike used as capture antigens (NTD,  
263 RBD, S1 or Ecto) can estimate neutralization with similar precision. Furthermore, the  
264 relationship between the levels of NTD and RBD antibodies is relatively conserved in different  
265 individuals; these antibodies compose the vast majority of the antibodies generated against  
266 spike. We asked whether the neutralization efficacy increases with higher proportions of RBD-  
267 or NTD-targeting antibodies (relative to all spike-targeting antibodies). Comparison of the RBD-  
268 to-Ecto or NTD-to-Ecto ratios with the neutralization efficacy of the samples showed no  
269 evidence for a relationship between these variables (**Fig. 5A** and **5B**). Similarly, the RBD-to-  
270 NTD ratio was not associated with the neutralization efficiency of the samples (**Fig. 5C**). These  
271 findings indicate that convalescent samples with high neutralizing activity do not contain a  
272 higher proportion of antibodies that target the RBD or NTD.

273 A large proportion of spike-targeting antibodies elicited by infection are non-neutralizing  
274 (36, 37). A recent study has shown that infected and immunized hosts with high levels of spike-  
275 specific antibodies generate a significantly higher proportion of non-neutralizing antibodies than  
276 individuals with lower levels of anti-spike antibodies (38). To explore this relationship in our  
277 samples, we implemented a model to examine evidence for a variable ratio between  
278 immunoassay values and neutralization efficacy. Two computational approaches were used; the  
279 first looks for non-log-linearity in the relationship between neutralization and immunoassay tests,  
280 whereas the second considers their rank-ratios and examines evidence for a systematic change  
281 over the ranks of the immunoassay results.

282 To compare the variables and avoid a bias related to the dynamic ranges of the values,  
283 we corrected the  $\log_{10}$ -transformed immunoassay and neutralization  $IC_{50}$  values to the same

284 scale by adjustment to a range from 0.1 to 1. For each sample we calculated the ratio between  
285 the immunoassay value and the  $IC_{50}$  value (see analysis of the Ecto ELISA data in **Fig. 5D**).  
286 This ratio was compared between the 20 samples with the lowest immunoassay values and the  
287 20 samples with the highest immunoassay values. Evaluation of these results did not find  
288 significantly different ratios in the two groups (see  $P$  value for an unpaired T test in **Fig. 5D**). A  
289 similar lack of a significant difference was observed when the RBD and NTD were used as  
290 capture antigens (**Supp. Fig. S6**). However, the cbELISA results suggested a higher ratio (i.e.,  
291 a lower relative neutralization efficacy) for the samples with high antibody levels.

292 To further explore whether the immunoassay-to-neutralization ratio shows any indication  
293 of dependence on the immunoassay value, we examined the variability in this ratio by looking  
294 for non-linearity in their log-relationship using all 85 samples. The null hypothesis tested was  
295 that the log-scale relationship between these variables should be linear, which was tested by  
296 considering a quadratic term for immunoassay results in a multiple linear regression (MLR)  
297 model. While the data appeared well modelled directly on a log-10 scale, to eliminate concerns  
298 about distributional assumptions, the regression coefficient was bootstrapped, and the  
299 corresponding 95% confidence interval determined. We first analyzed the results of the Ecto  
300 assay. As shown in **Fig. 5E**, an MLR slope value of 0 (i.e., lack of a quadratic effect, leaving a  
301 linear increase in neutralization activity for a given increase in binding) lies within the 95%  
302 confidence interval, so we fail to reject the null hypothesis that the variables follow a ratio  
303 relationship. Similar analyses of the data from the NTD, RBD and cbELISA tests also failed to  
304 show evidence at the 95% level to support a non-linear relationship between immunoassay  
305 values and neutralization (**Fig. 5F**).

306 We also applied a rank-based approach, whereby immunoassay and neutralization  
307 values were transformed to their ranks (from 1 to 85). A simple linear regression (SLR)  
308 coefficient was then fitted to the relationship between the immunoassay rank value and

309 immunoassay-to-neutralization rank-ratio, and bootstrapping was applied once more to produce  
310 95% confidence intervals. The null hypothesis tested was that a slope of zero exists for this  
311 relationship. Again, no evidence was observed to support the notion that the ratio between Ecto  
312 values and neutralization varies across different levels of S1/S2-targeting antibodies (**Fig. 5G**).  
313 A similar bootstrapping analysis of the rank values for the RBD, NTD and cbELISA failed to  
314 demonstrate a non-zero slope that would indicate a linear relationship between the two  
315 variables (**Fig. 5H**).

316         Given the sample size (n=85), the presence of a strong relationship between  
317 neutralization fraction and antibody binding activity seems unlikely. Nevertheless, we do  
318 observe negative non-significant coefficients for the quadratic effect of log-binding activity on  
319 neutralization levels, and positive non-significant coefficients of for the linear relationship  
320 between binding activity and the rank ratio of binding to neutralization (**Fig. 5, G and H**). Both of  
321 these results indicate the plausibility of a weak relationship between the neutralization ratio and  
322 binding activity measures, in which higher binding activity could be associated with lower  
323 proportional neutralization activity, but the magnitude of such an effect is likely to be limited.

324

## 325 **DISCUSSION**

326         Over the course of the COVID-19 pandemic, our understanding of the antibody response  
327 against SARS-CoV-2 has evolved. Initial investigations suggested that most neutralizing  
328 antibodies elicited by infection or vaccination target the RBD (9, 39). More recent studies have  
329 shown a co-dominance of antibodies that target the RBD and NTD (25, 26). Proteomic  
330 deconvolution studies of the IgG repertoire in COVID-19 convalescent patients suggested that  
331 the bulk of the neutralizing response targets epitopes outside the RBD (40). To better  
332 understand the target specificity of the response in different individuals, we analyzed the relative

333 level of antibodies against different domains, subunits and oligomeric forms of spike in COVID-  
334 19 convalescent samples. Our findings suggest the model shown in **Fig. 6**. A polyclonal  
335 antibody response is elicited in each infected individual against multiple domains of spike. High  
336 variation is observed between individuals in the amounts of antibodies generated; however,  
337 there is limited variation in the proportion of antibodies against the RBD and NTD (relative to all  
338 anti-spike antibodies). Similarly, limited variation is observed in the relationship between the  
339 amounts of antibodies against the RBD and NTD, with a ratio ranging between 1 and 3 in 78%  
340 of subjects. Importantly, the relative potency of the response (i.e., the level of neutralizing  
341 activity relative to the level of antibodies generated) is also constant in different individuals.  
342 Thus, the domain specificity and relative inhibitory activity of the response is conserved among  
343 individuals, with the main variation being the total amount of the antibodies produced.

344 Multiple commercial immunoassays have been developed that apply different  
345 components of the spike protein as the capture antigen (35, 41-44). Spike-based assays have  
346 been shown to estimate well the neutralization efficacy of convalescent serum and plasma  
347 samples (27-30). They are thus applied as qualitative measures of immunization status and can  
348 potentially serve as indirect measures of the efficacy of the anti-SARS-CoV-2 humoral  
349 response. Our studies suggest that any soluble form of spike that contains the RBD or NTD can  
350 serve as a capture antigen to accurately determine the immunization status of the individual and  
351 potentially the efficacy of the anti-SARS-CoV-2 humoral response. The constant proportion of  
352 antibodies against different spike domains also explains the ability of immunoassays that use  
353 various forms of the protein as capture antigens to predict neutralization. Indeed, our findings  
354 suggest that determinations of neutralizing titers based on serological tests do not require native  
355 forms of the protein as the capture antigen; RBD exhibits a similar predictive capacity to that of  
356 S1 or S1/S2, with only modestly lower performance for NTD. Thus, inclusion of S2 or  
357 trimerization of the protein to mimic the native form of spike does not improve the ability to

358 estimate the amount of neutralizing antibodies. In fact, the poorest performance was observed  
359 for the full-length, membrane-bound form of the protein measured by cell-based ELISA. The  
360 lower predictive capacity of the cbELISA may result from detection of non-neutralizing  
361 antibodies that may recognize the native form of spike (37). Alternatively, differential post-  
362 translational processing of spike in the HOS cells (relative to the human embryonic kidney 293T  
363 cells used to produce the recombinant proteins for these assays) may affect antigenicity of this  
364 protein (45).

365 We were surprised to discover that subjects with different amounts of spike-specific  
366 antibodies contained a constant level of relative potency. Such results contrast with a recent  
367 study by Amanat et al., which suggested that convalescent samples that contain high amounts  
368 of spike antibodies (as measured by the Mount Sinai Laboratory COVID-19 ELISA IgG Antibody  
369 Test) contain a higher proportion of non-neutralizing antibodies that target the full-length  
370 ectodomain of spike (38). It should be noted that in their calculations, the authors analyzed the  
371 immunoassay-to-IC<sub>50</sub> ratios using the raw values obtained in these tests. Unfortunately, such an  
372 approach can introduce a bias if the dynamic ranges of the two variables differ, which may  
373 impact the results of the analysis. To address this potential bias, we performed our calculations  
374 using ranks and values that were corrected to the same scale. Both approaches showed similar  
375 results, whereby the relative potency is constant in different samples, regardless of the amount  
376 of anti-spike antibodies generated. Future studies will reveal whether the target specificity of  
377 antibodies with neutralizing activity is also constant in different individuals and independent of  
378 the robustness of the response. Such studies are of particular importance in vaccinated  
379 individuals, to accurately quantify and characterize specificity of the antibody fractions that can  
380 protect from infection.

381



## 382 **MATERIALS AND METHODS**

### 383 **Collection of plasma and serum from donors and patients**

384 All blood donors were screened following the FDA guidance instructions under an  
385 institutional review board approved protocol (IRB #202003554). The consent signed by all  
386 donors allowed the use of blood samples for research purposes. Donors were identified and  
387 screened following FDA guidelines at the time they enrolled. Two study groups were assessed.  
388 The first is composed of 57 convalescent serum samples from subjects that had either been  
389 confirmed by reverse transcription polymerase chain reaction (RT-PCR) to be SARS-CoV-2  
390 positive from a nasopharyngeal swab (n=51) or had signs or symptoms of COVID-19 and were  
391 found to be positive by serological testing (n=6). All donors except one had relatively mild  
392 COVID-19 symptoms; this donor was hospitalized for one day due to palpitations. Donor  
393 screening was performed at least 10 days after resolution of symptoms. At the time of plasma  
394 collection, serum samples were collected in serum separator tubes and allowed to clot for at  
395 least 30 minutes. Serum was then isolated, aliquoted and stored at -80°C until use. The second  
396 study group is composed of convalescent plasma collected from women hospitalized for  
397 delivery, who had previously been infected by SARS-CoV-2, as confirmed by a SARS-CoV-2-  
398 positive PCR (n=7) or positive serology test (n=21). Samples were collected in EDTA-containing  
399 tubes, aliquoted and frozen until use at -80°C.

400

### 401 **Cells lines**

402 Vero-E6 cells, human embryonic kidney (HEK) 293T cells and human osteosarcoma  
403 (HOS) cells were obtained from the American Type Culture Collection (ATCC). Cells were  
404 cultured in Dulbecco's modified Eagle medium (DMEM) supplemented with 2-10% fetal calf  
405 serum (FCS) and 1% penicillin/streptomycin. All cells were maintained in a humidified incubator

406 at 37°C and 5% CO<sub>2</sub>.

407

## 408 **Recombinant proteins and their production**

409 Capture antigens that contain different spike protein components were generated. The  
410 NTD, RBD or ectodomain of S1/S2 (Ecto) antigens were fused to the Fc region of human IgG1,  
411 rendering them dimeric. NTD and RBD contain amino acids 1-309 and 310-529 of spike,  
412 respectively. The Ecto protein contains the entire ectodomain of spike (amino acids 1-1274). To  
413 abrogate the furin cleavage site in Ecto, we substituted the Arg-Arg-Ala-Arg motif at position  
414 683-686 with Ser-Ser-Ala-Ser. All proteins were produced by transient transfection of 293T cells  
415 using polyethyleneimine (PEI), as previously described (46). Proteins were harvested in 293S  
416 ProCDM and purified using Protein A beads. Eluted products were dialyzed against phosphate  
417 buffered saline (pH 7.4). All proteins were analyzed by SDS-PAGE and visualized by silver  
418 staining to verify their molecular weight and purity.

419

## 420 **ELISA using RBD, NTD and S1/S2 as capture antigens**

421 The RBD, NTD and Ecto recombinant proteins were used as capture antigens in an  
422 enzyme-linked immunosorbent assay (ELISA). Briefly, proteins were suspended in PBS at a  
423 concentration of 25 nM (2 µg/mL of NTD, 1.37 µg/mL of RBD and 5 µg/mL of Ecto) and  
424 incubated overnight in protein-binding 96-well plates (PerkinElmer). The next day, wells were  
425 washed once with blocking buffer, composed of 140 mM NaCl, 1.8 mM CaCl<sub>2</sub>, 1 mM MgCl<sub>2</sub>, 25  
426 mM Tris pH 7.5, 20 mg/ml BSA and 1.1% nonfat dry milk. Serum or plasma samples were  
427 diluted 1:500 (vol:vol) in blocking buffer, added to the wells and incubated for 45 min at room  
428 temperature. Samples were then washed four times with blocking buffer and a horseradish  
429 peroxidase (HRP)-conjugated secondary antibody that targets the kappa light chain of human

430 IgG1 was added (diluted 1:1200 in blocking buffer). After incubation for one hour at room  
431 temperature, samples were washed 5 times with blocking buffer and 5 times with washing buffer  
432 (140 mM NaCl, 1.8 mM CaCl<sub>2</sub>, 1 mM MgCl<sub>2</sub> and 25 mM Tris pH 7.5). HRP enzyme activity was  
433 measured by light emission using Supersignal West Pico Plus chemiluminescence detection  
434 reagents with a Synergy H1 microplate reader.

435

#### 436 **Cell-based ELISA measurements of antibodies against SARS-CoV-2 spike**

437 Binding of serum antibodies to SARS-CoV-2 spike expressed on HOS cells was  
438 measured using a previously-described cell-based ELISA system (22, 24). Briefly, HOS cells  
439 were seeded in white opaque 96-well plates (1.4 × 10<sup>4</sup> cells per well) and transfected the next  
440 day with 80 ng per well of pCG1-SARS-2-S plasmid expressing SARS-CoV-2 spike using  
441 JetPrime transfection reagent. To quantify background binding of the antibodies to the cells, a  
442 similar number of wells was transfected using a negative control plasmid ( $\Delta$ KS) that does not  
443 encode for a viral protein product (23). Three days after transfection, cells were washed with  
444 blocking buffer, and serum samples diluted 1,000-fold in blocking buffer were incubated with the  
445 cells for one hour at room temperature. Cells were then washed 5 times with blocking buffer and  
446 incubated for 45 minutes at room temperature with an HRP-conjugated goat anti-human kappa  
447 chain preparation that was diluted 1:1,200 in blocking buffer. Cells were then washed 5 times  
448 with blocking buffer and 5 times with washing buffer. HRP enzyme activity was measured by  
449 chemiluminescence with a Synergy H1 microplate reader.

450

#### 451 **Commercial immunoassays to measure antibodies that target SARS-CoV-2 proteins**

452 The DiaSorin Liaison SARS-CoV-2 S1/S2 IgG chemiluminescence assay detects IgG  
453 against spike subunits S1 and S2. Samples were analyzed according to the manufacturer's

454 guidelines on a DiaSorin Liaison XL automated chemiluminescence analyzer (DiaSorin,  
455 Saluggia, Italy). A signal of 15 arbitrary units (AU) per mL or higher is defined by the  
456 manufacturer as a positive result. The DiaSorin TrimericS IgG assay applies the soluble trimeric  
457 form of the S1/S2 subunits. Samples were analyzed on a DiaSorin Liaison XL automated  
458 chemiluminescence analyzer. A signal of 13 AU/mL is defined as a positive result. The Roche  
459 electrochemiluminescence immunoassay measures total immunoglobulins that target the  
460 SARS-CoV-2 nucleocapsid (N) protein. Samples were analyzed according to the manufacturer's  
461 guidelines using the Elecsys Anti-SARS-CoV-2 assay on the Roche cobas e602 platform  
462 (Roche Diagnostics). A cut-off index (COI) of 1.0 or higher is defined by the manufacturer as a  
463 positive result. The Ortho COVID-19 IgG antibody test was performed on Ortho's VITROS®  
464 system. The signal at cutoff (S/C) value as defined by the manufacturer is 1 unit or greater for a  
465 reactive sample. For simplicity, all values of the commercial immunoassays are reported in  
466 arbitrary units (AUs).

467

#### 468 **Infection and neutralization of replication-competent SARS-CoV-2**

469 SARS-CoV-2 strain USA-WA1\_2020 was obtained from BEI Resources and maintained  
470 under biosafety level 3 (BSL-3) conditions. To propagate virus, Vero-E6 cells cultured in  
471 DMEM/FCS 2% were infected at a multiplicity of infection (MOI) of 0.001. Forty-eight hours after  
472 infection, supernatants were harvested, filtered through 0.45 µm pore-sized membranes, and  
473 frozen at -80°C until use. To quantify the amount of infectious virus, Vero-E6 cells were seeded  
474 in 96-well plates ( $1.5 \times 10^4$  cells per well). The next day, serial dilutions of the virus were added  
475 to 8 replicate wells for each dilution and cytopathic effects were evaluated over the next 5 days.  
476 The median tissue culture infectious dose (TCID<sub>50</sub>) was used to quantify virus titer, which  
477 describes the dilution of the virus at which fewer than half of the replicate wells show cytopathic  
478 effects.

479 To measure neutralization, serial two-fold dilutions of the serum samples (ranging from  
480 1:40 to 1:2,560) were prepared in DMEM/FCS 2%. Virus was added to the diluted serum at a  
481 final concentration of 25 TCID<sub>50</sub> per well. Samples were incubated at room temperature for one  
482 hour and added to Vero-E6 cells seeded the day before in 96-well plates ( $1.5 \times 10^4$  cells per  
483 well). Six replicate wells were used for each dilution. Cells were then cultured for 4 days at 37°C  
484 until infectivity was evaluated. The number of wells in which intact monolayers were present  
485 was assessed using an inverted light microscope. The 50% neutralizing titer (IC<sub>50</sub>) was  
486 calculated by the serum dilution at which 50% or more of the wells showed no cytopathic  
487 effects. To determine the precise IC<sub>50</sub> value, the number of wells in which cytopathic effects  
488 were observed at each serum dilution was recorded. These values, along with the log-  
489 transformed dilution values were fit to a non-linear regression model using GraphPad Prism 8 to  
490 calculate the IC<sub>50</sub> value.

491

## 492 **Production and neutralization of vesicular stomatitis virus pseudotyped by the SARS-** 493 **CoV-2 spike protein**

494 Vesicular stomatitis virus (VSV) pseudovirions bearing the SARS-CoV-2 spike protein  
495 (VSV-SARS2-S) were generated as previously described (5). Briefly, 293T cells were seeded in  
496 100 mm plates ( $2.2 \times 10^6$  cells per plate) and transfected 24 hours later by 16 µg of pCG1-  
497 SARS-2-S plasmid (a kind gift from Dr. Stefan Pöhlmann) using PEI transfection protocol (46).  
498 Twenty-four hours after transfection, cells were infected with a stock of VSV pseudovirus that  
499 encodes the firefly luciferase gene in place of the native VSV-G glycoprotein gene and contains  
500 the glycoprotein of Lassa virus (5). Six hours later, infected cultures were washed twice with  
501 phosphate buffered saline (PBS, pH 7.4) to remove input pseudovirions, and fresh DMEM/FCS  
502 2% was added. Media was collected at 24- and 48-hours after infection, the supernatants were  
503 filtered through 0.45 µm pore-sized membranes and centrifuged at  $5,380 \times g$  for 16 hours at

504 4°C. The pellet was resuspended in PBS and centrifuged through a 20% sucrose cushion at  
505  $134,000 \times g$  for 2 hours at 10°C. Pellets containing the pseudoviruses were resuspended in  
506 PBS and stored at -80°C until use.

507 For neutralization assays, two-fold serial dilutions of the serum samples were prepared  
508 in DMEM/5% FCS, ranging between 1:40 and 1:2,560. Viruses were added to the diluted serum  
509 at a concentration calculated to yield between 100,000 and 200,000 relative light units (RLUs) of  
510 luciferase activity per well. These values were determined to be within the linear range of virus  
511 input versus luciferase activity measured. Vero-E6 target cells were seeded the day before  
512 infection in 96-well white opaque flat-bottomed plates ( $1.5 \times 10^4$  cells per well). The virus-serum  
513 or virus-plasma mixture was incubated for one hour at 37°C and added to the wells. Six  
514 replicate wells were used for each condition. Samples were then incubated for 24 h at 37°C,  
515 after which the media were removed and 35  $\mu$ l of Passive Lysis buffer (Promega) was added to  
516 each well. Luciferase activity was recorded as a measure of viral infection, as previously  
517 described (24). Briefly, 100  $\mu$ l of luciferin buffer containing 15 mM  $MgSO_4$ , 15 mM  $KPO_4$  (pH  
518 7.8), 1 mM ATP, and 1 mM dithiothreitol was added to each well, followed by 50  $\mu$ l of 1 mM d-  
519 luciferin potassium salt (Syd Laboratories). Luminescence was detected using a Synergy H1  
520 Hybrid reader (BioTek Instruments).

521

## 522 **Permutation test to compare precision of immunoassays**

523 For each immunoassay, we obtained the curve that describes the required percentile of  
524 samples for each neutralization threshold to yield a precision of 0.9. The area above the curve  
525 was then determined, which describes all percentile-neutralization threshold combinations that  
526 yield a precision level higher than the minimum precision of interest (here, 0.9). This metric thus  
527 captures the precision of each assay across multiple neutralization thresholds. To test for

528 significant difference between the area above the curve for any two immunoassays, we used a  
529 permutation test. The null and alternative hypotheses for a one-sided test can be stated as:

530 
$$H_0: A_i = A_j$$

531 
$$H_1: A_i > A_j \quad i \neq j \ \& \ i, j = 1, 2, \dots, M$$

532 where  $A_i$  and  $A_j$  describe the area above the curve for immunoassays  $i$ , and  $j$ , respectively, and  
533  $M$  is the total number of immunoassays tested. To test the above hypothesis, we first log-  
534 transformed immunoassay values and standardized them to a scale of 0 to 1:

$$X_{new}^i = \frac{X^i - \min(X^i)}{\max(X^i) - \min(X^i)}$$

535 where,  $X^i$  is the vector of values for immunoassay  $i$ . The difference between the area above the  
536 curve for  $i$  and  $j$  was then calculated, denoted as  $D_{ij}$ . We then performed a permutation test  
537 whereby we permuted for each patient sample the immunoassay identifiers and the area above  
538 the curve was recalculated for each immunoassay. This process was repeated 1,000 times ( $k =$   
539  $1, 2, \dots, 1000$ ). The difference between the areas above the curves for each iteration of the  
540 permutation test was defined as  $d_{ij}^k$ . The instances that the permuted value of  $d_{ij}^k$  was greater  
541 than or equal to the non-permuted  $D_{ij}$  was calculated and expressed as a fraction of the number  
542 of iterations performed, which was defined as the  $P$  value for testing the null hypothesis.

543

#### 544 **Multiple linear Regression and rank-based simple linear regression**

545 In the absence of a universal gold standard,  $\log_{10}$ -transformations appeared reasonable  
546 to capture immunoassay values and neutralization activity. Under our null hypothesis, a change  
547 in binding activity,  $\log_{10}(X)$ , should be associated with a linear increase in neutralization,  
548  $\log_{10}(Y)$ . This relationship can be expressed as a linear regression on the log-scale:

549  $\log(y) = \beta_0 + \beta_1 \log(x) + \epsilon$ . A simple way of detecting departures from this model is to look for  
550 curvature in the effect of  $\log(x)$ :  $\log(y) = \beta_0 + \beta_1 \log(x) + \beta_2 \log(x)^2 + \epsilon$ . Any evidence that  $\beta_2$   
551 is nonzero will show departure from the hypothesized relationship; for example, if higher values  
552 of binding activity produce a diminished change in neutralization efficacy, we would expect  $\beta_2$  to  
553 be negative. We therefore fit a multiple linear regression with the outcome variable of  $\log\text{-IC}_{50}$   
554 and each of the log-scale immunoassay variables in turn as  $X$ . To avoid any problematic  
555 assumptions about the distribution of the error term  $\epsilon$ , the MLR was fit under a bootstrapping  
556 procedure, in which 50,000 repeated samples were taken to produce a bootstrap distribution of  
557 the parameter estimates. This was used to compute non-parametric 95% confidence intervals  
558 for the  $\beta_2$  quadratic effects.

559 In addition to this MLR approach using log-transformed assay values, we conducted a  
560 series of rank-based analyses. Rather than focusing on the ratio-relationship directly, we  
561 hypothesized that high neutralization values (relative to the sampling distribution) should  
562 correspond to high binding values (relative to the sampling distribution), in such a way that the  
563 rank-ratios,  $\frac{X_r}{Y_r}$ , should follow a distribution with mean not depending on the binding rank,  $X_r$ .  
564 This was investigated via a bootstrapped simple linear regression with the rank-ratio of binding  
565 to neutralization as the outcome, and the binding rank as the single explanatory variable. Under  
566 the null hypothesis, the slope parameter for the binding rank,  $\beta_1$ , should be equal to zero. We  
567 again performed 50,000 repeated samples to produce bootstrap distributions and corresponding  
568 non-parametric confidence intervals for  $\beta_1$ .

569



570 **ACKNOWLEDGEMENTS**

571           We thank all blood donors that contributed samples to this study and Julie Kurt from the  
572 Department of Pathology and Drs. Mary Rysavy and Kim Kenne from the Department of  
573 Gynecology and Obstetrics at the University of Iowa for assistance in coordinating these  
574 studies. We also thank Michelle Sexton of the Iowa State Hygienic Laboratory and Dr. Louis  
575 Katz of the Mississippi Valley Regional Blood Center for assistance in conducting the  
576 immunoassays. This work was supported by the Department of Pathology at the University of  
577 Iowa. DWB was supported by NIH T32 AI007511. KR and HVE were supported by NIH  
578 T32GM007337. HVE and NR were supported by NIH R01AI134733 and R21 AI144215 to WJM.  
579 The funders had no role in study design, data collection and interpretation, or the decision to  
580 submit the work for publication. All corresponding authors had full access to all the data in the  
581 study and had final responsibility for the decision to submit the manuscript for publication.

**Table 1. Immunoassays and capture antigens used in this study.**

| <b>Assay</b>                | <b>Samples tested (serum, plasma)</b> | <b>Capture antigen used in assay</b> | <b>Assay type</b> | <b>Ig isotype detected<sup>a</sup></b> |
|-----------------------------|---------------------------------------|--------------------------------------|-------------------|----------------------------------------|
| <b>NTD (ELISA)</b>          | 85 (57, 28)                           | NTD                                  | In-house ELISA    | IgG, IgM, IgA                          |
| <b>RBD (ELISA)</b>          | 85 (57, 28)                           | RBD                                  | In-house ELISA    | IgG, IgM, IgA                          |
| <b>S1/S2 (ELISA)</b>        | 85 (57, 28)                           | S1/S2 ectodomain                     | In-house ELISA    | IgG, IgM, IgA                          |
| <b>Cell-based ELISA</b>     | 85 (57, 28)                           | Full-length S1/S2 trimers            | In-house ELISA    | IgG, IgM, IgA                          |
| <b>TrimericS (DiaSorin)</b> | 85 (57, 28)                           | Trimeric S1/S2 ectodomain            | Commercial assay  | IgG                                    |
| <b>Liaison (DiaSorin)</b>   | 85 (57, 28)                           | S1/S2 ectodomain                     | Commercial assay  | IgG                                    |
| <b>Vitros (Ortho)</b>       | 60 (57, -)                            | S1                                   | Commercial assay  | IgG                                    |
| <b>Roche</b>                | 71 (43, 28)                           | Nucleocapsid                         | Commercial assay  | IgG, IgM, IgA                          |

<sup>a</sup> The secondary antibody used in the NTD, RBD and Ecto ELISAs and the cell-based ELISA targets the human kappa light chain.

583 **FIGURE LEGENDS**

584 **Figure 1.** Comparison of immunoassays that apply different components of the SARS-CoV-2  
585 spike protein as capture antigens. **(A)** Top, domains of the spike protein. NTD, N-terminal  
586 domain; RBD, receptor-binding domain; CTD, C-terminal domain; TM, transmembrane domain;  
587 CT, cytoplasmic tail. Bottom, schematic of the constructs used as capture antigens in this study.  
588 **(B)** SARS-CoV-2 antibody levels in 85 convalescent serum and plasma samples were tested  
589 using the RBD, NTD and Ecto ELISAs, as well as the cell-based ELISA. Distributions of the  
590  $\log_{10}$ -transformed values are shown (see similar plots for commercial assays in **Supp. Fig.**  
591 **S1C**). **(C)** Spearman rank correlation coefficients between values measured in the eight  
592 immunoassays. Cells are colored by the *P* values determined in a two-tailed test. **(D)**  
593 Correlation between values in ELISAs that apply the NTD and RBD as capture antigens. RLU,  
594 relative light units. **(E)** Correlation between the sum of the values measured in the ELISAs that  
595 apply RBD and NTD, and values measured in the ELISA that applies Ecto as the capture  
596 antigen. The dashed red line describes a 1:1 relationship. **(F)** Distribution among the 85  
597 convalescent samples of the ratio between  $\log$ -transformed values measured in the RBD and  
598 NTD assays.

599

600 **Figure 2.** Relationships between immunoassay values of COVID-19 convalescent samples and  
601 their neutralization of spike-containing pseudovirus. **(A)** Neutralization titers of the serum or  
602 plasma samples were measured using replication-defective pseudovirus that contains the spike  
603 protein of SARS-CoV-2. Data describe the distribution of the  $\log_{10}$ -transformed  $IC_{50}$  values. **(B)**  
604 Comparison of neutralization and immunoassay values. All 85 samples are ordered by their  
605 neutralization titers (color-coded in shades of pink, with low values in lighter shades). Values  
606 measured in immunoassays are color-coded in shades of green. **(C)** Correlations between

607 immunoassay values and neutralization titers.  $r_s$ , Spearman correlation coefficient.  $P$  value, two-  
608 tailed test.

609

610 **Figure 3.** Precision of immunoassays to estimate the neutralization efficacy of COVID-19  
611 convalescent serum and plasma. **(A)** Calculations of precision across different immunoassay  
612 percentiles. Precision was calculated as the number of samples with an  $IC_{50}$  greater than the  
613 defined threshold relative to the number of samples in the immunoassay percentile tested. Each  
614 data point describes precision of an immunoassay to predict neutralization at the indicated  $IC_{50}$   
615 threshold using the indicated percentile of samples. **(B)** The area above the curve metric. The  
616 border between the shaded and unshaded areas describes the percentiles of Ecto values  
617 required to predict neutralization at the indicated thresholds with a precision of 0.9. For  
618 example, the intersection between the red lines indicates that, to predict with a precision of 0.9  
619 for a threshold  $IC_{50}$  of 1:1,000, samples with Ecto values in the 85<sup>th</sup> percentile should be used.  
620 The shaded area describes all neutralization threshold-percentile combinations that yield a  
621 precision of 0.9 or higher. **(C)** The area above the curve shown in panel B calculated for all  
622 immunoassays, based on a required precision of 0.9. **(D)** Calculations of the area above the  
623 curve for required precision levels of 0.75 to 0.95. **(E)** Statistical significance of the differences  
624 between predictive capacity of the immunoassays. The area above the curve was calculated for  
625 all immunoassays for a precision of 0.9. Significance of the difference between predictive  
626 capacity of any two assays was determined by a permutation test.  $P$  values of the one-sided  
627 test are shown. Cells are color coded by the  $P$  values calculated.

628

629 **Figure 4.** Immunoassay-based estimations of replicative SARS-CoV-2 neutralization. **(A)**  
630 Twenty-four serum samples were tested for their neutralization of replicative SARS-CoV-2. The  
631 distribution of  $IC_{50}$  values is shown. For three samples, the  $IC_{50}$  was not achieved at the lowest

632 dilution (1:40) of the serum (columns colored in red). **(B)** Correlation between  $IC_{50}$  values of the  
633 24 serum samples, as measured using replication-competent SARS-CoV-2 and the VSV-SARS-  
634 S pseudovirus. **(C)** Comparison of neutralization and immunoassay values. Samples are  
635 ordered by their neutralization efficacy of replicative SARS-CoV-2 (color-coded in shades of  
636 pink, with low values in lighter shades). Values measured in immunoassays are color-coded in  
637 shades of green. **(D)** Precision of immunoassays to estimate SARS-CoV-2 neutralization at an  
638  $IC_{50}$  threshold of 1:400 using different percentiles of the samples based on their immunoassay  
639 values. **(E)** Area above the curve calculated for a required precision of 0.9. **(F)** Performance of  
640 immunoassays to estimate neutralization at precision levels of 0.75 to 0.95. **(G)** Statistical  
641 significance of the differences between predictive capacities of the immunoassays, as  
642 determined by a permutation test. Calculations apply the area above the curve computed for a  
643 required precision of 0.9.  $P$  values of the one-sided test are shown. Cells are color coded by the  
644  $P$  values.

645

646 **Figure 5.** Relationship between the relative neutralizing potency of convalescent samples and  
647 their content of spike-specific antibodies. **(A,B)** Comparison of the relative RBD or NTD binding  
648 values (expressed as a fraction of the Ecto value) and neutralization efficacy of the samples.  
649 **(C)** Comparison of the ratio between RBD and NTD values and neutralization efficacy. **(D)**  $IC_{50}$   
650 values of convalescent samples and their immunoassay values were  $\log_{10}$ -transformed and  
651 adjusted to a scale of 0.1 to 1. The ratio between the Ecto ELISA value and the  $IC_{50}$  of each  
652 sample was calculated for all samples. Patient samples are arranged by increasing Ecto values,  
653 from left to right. The ratios calculated for the 20 samples with the lowest and the 20 samples  
654 with the highest Ecto values were compared using an unpaired T test; the  $P$  value for a two-  
655 tailed test is indicated. **(E)** Bootstrap distribution for quadratic term in MLR describing the  
656 relationship between log-Ecto values and log- $IC_{50}$  values, evaluating evidence for a non-

657 constant ratio relationship. A 95% bootstrap confidence interval was determined from bootstrap  
658 sample quantiles. **(F)** The quadratic term was calculated by 50,000 iterations of bootstrap  
659 resampling for NTD, RBD, Ecto and cbELISA data. The boxed area shows the second and third  
660 quartiles. Whiskers describe the range for two standard deviations. **(G)** Bootstrapped rank  
661 regression. The rank order of Ecto values for all 85 samples was determined as well as the ratio  
662 between the ranks of the Ecto value and  $IC_{50}$ . A simple linear regression model was fit to the  
663 relationship between the two variables. A bootstrapping procedure was performed to estimate  
664 the slope coefficient. The bootstrap distribution and corresponding 95% confidence interval are  
665 shown. **(H)** The rank regression coefficient was calculated by bootstrap resampling using NTD,  
666 RBD, Ecto or cbELISA data.

667

668 **Figure 6.** Model of the polyclonal antibody response elicited against the SARS-CoV-2 spike  
669 protein. SARS-CoV-2-infected individuals generate different amounts of spike-targeting  
670 antibodies (represented by the size of the blue rectangles). The fraction of antibodies that target  
671 the RBD or NTD is constant in different individuals, with a mean RBD-to-NTD ratio of 1.8. The  
672 relative neutralization potency (represented by the green-shaded area) is also similar in different  
673 individuals. Question marks indicate the yet unknown domain distribution of the fraction of  
674 antibodies that contains neutralizing activity (i.e., positioning of the green-shaded area).

675 **SUPPLEMENTAL FILES**

676 **Supplemental Figure S1.** Measurements of spike-targeting antibodies in 85 convalescent  
677 samples using immunoassays that apply different components of SARS-CoV-2 as capture  
678 antigens. **(A)** Distribution of the time interval between the PCR test indicating infection by  
679 SARS-CoV-2 and collection time of the samples used for this study. **(B)** Normality tests of  
680 immunoassay values. The Shapiro-Wilk test was performed for the immunoassay values and for  
681 the  $\log_{10}$ -transformed immunoassay values. The null hypothesis for this test is that the data are  
682 normally distributed. *P* values lower than 0.05 indicate that the null hypothesis is rejected. **(C)**  
683 Distribution of immunoassay values measured for 85 convalescent using commercial tests.

684

685 **Supplemental Figure S2.** Comparison of the  $\log_{10}$ -transformed values measured in eight  
686 immunoassays for 85 convalescent serum and plasma samples. Values in the commercial  
687 assays are expressed in arbitrary units (AUs) whereas values in ELISAs are expressed in  
688 relative light units (RLUs). Values in the x and y axes are shown in  $\log_{10}$  scale. Correlation  
689 coefficients are shown in **Fig. 1C**.

690

691 **Supplemental Figure S3.** Relationship between timing of sample collection and target  
692 specificity of the antibody response. The interval (in days) between the PCR-positive test  
693 indicating SARS-CoV-2 infection and the time of plasma or serum collection for these studies  
694 was determined. **(A-C)** Immunoassay values are compared between samples with an interval of  
695 10-45 days ( $n=43$ ), and samples with an interval of 103-277 days ( $n=9$ ). **(D,E)** Comparison of  
696 the RBD/Ecto or NTD/Ecto ratios for samples collected after the indicated intervals from  
697 detection of infection by PCR. *P* Value, two-tailed test.

698

699 **Supplemental Figure S4.** Immunoassay percentiles required to predict neutralization at the  
700 indicated thresholds with a precision of 0.9. The shaded area describes the combination  
701 between neutralization thresholds and sample immunoassay percentiles that allow prediction  
702 with a precision of 0.9 or higher. The Roche test did not achieve a precision of 0.9, and thus a  
703 value could not be computed for this assay.

704

705 **Supplemental Figure S5.** Relationships between immunoassay values of COVID-19  
706 convalescent samples and their neutralization of replicative SARS-CoV-2.  $r_s$ , Spearman  
707 correlation coefficient.  $P$  value, two-tailed test.

708

709 **Supplemental Figure S6.** Relationship between the level of spike-specific antibodies in  
710 convalescent samples and their relative neutralization potency.  $IC_{50}$  values of convalescent  
711 samples and their immunoassay values were log-transformed and adjusted to a scale of 0.1 to  
712 1. For each sample, the ratio between the immunoassay value and the  $IC_{50}$  value was  
713 calculated and shown. Samples are ordered by increasing immunoassay values from left to  
714 right. The ratios calculated for the 20 samples with the lowest immunoassay values and the 20  
715 samples with the highest immunoassay values were compared using an unpaired T test; the  $P$   
716 values for a two-tailed test are indicated.

717

718 **Supplemental Table S1.** Sample donor information. n.a., indicated data not available.



719 **REFERENCES**

- 720 1. Shang B, Wang XY, Yuan JW, Vabret A, Wu XD, Yang RF, Tian L, Ji YY, Deubel V, Sun  
721 B. 2005. Characterization and application of monoclonal antibodies against N protein of  
722 SARS-coronavirus. *Biochem Biophys Res Commun* 336:110-7.
- 723 2. Walls AC, Park YJ, Tortorici MA, Wall A, McGuire AT, Velesler D. 2020. Structure,  
724 Function, and Antigenicity of the SARS-CoV-2 Spike Glycoprotein. *Cell* 181:281-292 e6.
- 725 3. Hoffmann M, Kleine-Weber H, Pohlmann S. 2020. A Multibasic Cleavage Site in the  
726 Spike Protein of SARS-CoV-2 Is Essential for Infection of Human Lung Cells. *Mol Cell*  
727 78:779-784 e5.
- 728 4. Wrapp D, Wang N, Corbett KS, Goldsmith JA, Hsieh CL, Abiona O, Graham BS,  
729 McLellan JS. 2020. Cryo-EM structure of the 2019-nCoV spike in the prefusion  
730 conformation. *Science* 367:1260-1263.
- 731 5. Hoffmann M, Kleine-Weber H, Schroeder S, Kruger N, Herrler T, Erichsen S, Schiergens  
732 TS, Herrler G, Wu NH, Nitsche A, Muller MA, Drosten C, Pohlmann S. 2020. SARS-  
733 CoV-2 Cell Entry Depends on ACE2 and TMPRSS2 and Is Blocked by a Clinically  
734 Proven Protease Inhibitor. *Cell* 181:271-280 e8.
- 735 6. Tang T, Jaimes JA, Bidon MK, Straus MR, Daniel S, Whittaker GR. 2021. Proteolytic  
736 Activation of SARS-CoV-2 Spike at the S1/S2 Boundary: Potential Role of Proteases  
737 beyond Furin. *ACS Infect Dis* 7:264-272.
- 738 7. Cao Y, Su B, Guo X, Sun W, Deng Y, Bao L, Zhu Q, Zhang X, Zheng Y, Geng C, Chai  
739 X, He R, Li X, Lv Q, Zhu H, Deng W, Xu Y, Wang Y, Qiao L, Tan Y, Song L, Wang G, Du  
740 X, Gao N, Liu J, Xiao J, Su XD, Du Z, Feng Y, Qin C, Qin C, Jin R, Xie XS. 2020. Potent  
741 Neutralizing Antibodies against SARS-CoV-2 Identified by High-Throughput Single-Cell  
742 Sequencing of Convalescent Patients' B Cells. *Cell* 182:73-84 e16.

- 743 8. Wu Y, Wang F, Shen C, Peng W, Li D, Zhao C, Li Z, Li S, Bi Y, Yang Y, Gong Y, Xiao H,  
744 Fan Z, Tan S, Wu G, Tan W, Lu X, Fan C, Wang Q, Liu Y, Zhang C, Qi J, Gao GF, Gao  
745 F, Liu L. 2020. A noncompeting pair of human neutralizing antibodies block COVID-19  
746 virus binding to its receptor ACE2. *Science* 368:1274-1278.
- 747 9. Zhou X, Ma F, Xie J, Yuan M, Li Y, Shaabani N, Zhao F, Huang D, Wu NC, Lee CD, Liu  
748 H, Li J, Chen Z, Hong Y, Liu WH, Xiao N, Burton DR, Tu H, Li H, Chen X, Teijaro JR,  
749 Wilson IA, Xiao C, Huang Z. 2021. Diverse immunoglobulin gene usage and convergent  
750 epitope targeting in neutralizing antibody responses to SARS-CoV-2. *Cell Rep*  
751 35:109109.
- 752 10. Brouwer PJM, Caniels TG, van der Straten K, Snitselaar JL, Aldon Y, Bangaru S, Torres  
753 JL, Okba NMA, Claireaux M, Kerster G, Bentlage AEH, van Haaren MM, Guerra D,  
754 Burger JA, Schermer EE, Verheul KD, van der Velde N, van der Kooi A, van Schooten J,  
755 van Breemen MJ, Bijl TPL, Sliepen K, Aartse A, Derking R, Bontjer I, Kootstra NA,  
756 Wiersinga WJ, Vidarsson G, Haagmans BL, Ward AB, de Bree GJ, Sanders RW, van  
757 Gils MJ. 2020. Potent neutralizing antibodies from COVID-19 patients define multiple  
758 targets of vulnerability. *Science* 369:643-650.
- 759 11. Cerutti G, Guo Y, Zhou T, Gorman J, Lee M, Rapp M, Reddem ER, Yu J, Bahna F,  
760 Bimela J, Huang Y, Katsamba PS, Liu L, Nair MS, Rawi R, Olia AS, Wang P, Zhang B,  
761 Chuang GY, Ho DD, Sheng Z, Kwong PD, Shapiro L. 2021. Potent SARS-CoV-2  
762 neutralizing antibodies directed against spike N-terminal domain target a single  
763 supersite. *Cell Host Microbe* 29:819-833 e7.
- 764 12. Robbiani DF, Gaebler C, Muecksch F, Lorenzi JCC, Wang Z, Cho A, Agudelo M, Barnes  
765 CO, Gazumyan A, Finkin S, Hagglof T, Oliveira TY, Viant C, Hurley A, Hoffmann HH,  
766 Millard KG, Kost RG, Cipolla M, Gordon K, Bianchini F, Chen ST, Ramos V, Patel R,  
767 Dizon J, Shimeliovich I, Mendoza P, Hartweg H, Nogueira L, Pack M, Horowitz J,  
768 Schmidt F, Weisblum Y, Michailidis E, Ashbrook AW, Waltari E, Pak JE, Huey-Tubman

- 769 KE, Koranda N, Hoffman PR, West AP, Jr., Rice CM, Hatziioannou T, Bjorkman PJ,  
770 Bieniasz PD, Caskey M, Nussenzweig MC. 2020. Convergent antibody responses to  
771 SARS-CoV-2 in convalescent individuals. *Nature* 584:437-442.
- 772 13. Zhou D, Dejnirattisai W, Supasa P, Liu C, Mentzer AJ, Ginn HM, Zhao Y, Duyvesteyn  
773 HME, Tuekprakhon A, Nutalai R, Wang B, Paesen GC, Lopez-Camacho C, Slon-  
774 Campos J, Hallis B, Coombes N, Bewley K, Charlton S, Walter TS, Skelly D, Lumley SF,  
775 Dold C, Levin R, Dong T, Pollard AJ, Knight JC, Crook D, Lambe T, Clutterbuck E, Bibi  
776 S, Flaxman A, Bittaye M, Belij-Rammerstorfer S, Gilbert S, James W, Carroll MW,  
777 Klenerman P, Barnes E, Dunachie SJ, Fry EE, Mongkolsapaya J, Ren J, Stuart DI,  
778 Screaton GR. 2021. Evidence of escape of SARS-CoV-2 variant B.1.351 from natural  
779 and vaccine-induced sera. *Cell* 184:2348-2361 e6.
- 780 14. Zost SJ, Gilchuk P, Chen RE, Case JB, Reidy JX, Trivette A, Nargi RS, Sutton RE,  
781 Suryadevara N, Chen EC, Binshtein E, Shrihari S, Ostrowski M, Chu HY, Didier JE,  
782 MacRenaris KW, Jones T, Day S, Myers L, Eun-Hyung Lee F, Nguyen DC, Sanz I,  
783 Martinez DR, Rothlauf PW, Bloyet LM, Whelan SPJ, Baric RS, Thackray LB, Diamond  
784 MS, Carnahan RH, Crowe JE, Jr. 2020. Rapid isolation and profiling of a diverse panel  
785 of human monoclonal antibodies targeting the SARS-CoV-2 spike protein. *Nat Med*  
786 26:1422-1427.
- 787 15. Dogan M, Kozhaya L, Placek L, Gunter C, Yigit M, Hardy R, Plassmeyer M, Coatney P,  
788 Lillard K, Bukhari Z, Kleinberg M, Hayes C, Arditi M, Klapper E, Merin N, Liang BT,  
789 Gupta R, Alpan O, Unutmaz D. 2021. SARS-CoV-2 specific antibody and neutralization  
790 assays reveal the wide range of the humoral immune response to virus. *Commun Biol*  
791 4:129.
- 792 16. Chi X, Yan R, Zhang J, Zhang G, Zhang Y, Hao M, Zhang Z, Fan P, Dong Y, Yang Y,  
793 Chen Z, Guo Y, Zhang J, Li Y, Song X, Chen Y, Xia L, Fu L, Hou L, Xu J, Yu C, Li J,

- 794 Zhou Q, Chen W. 2020. A neutralizing human antibody binds to the N-terminal domain  
795 of the Spike protein of SARS-CoV-2. *Science* 369:650-655.
- 796 17. Suryadevara N, Shrihari S, Gilchuk P, VanBlargan LA, Binshtein E, Zost SJ, Nargi RS,  
797 Sutton RE, Winkler ES, Chen EC, Fouch ME, Davidson E, Doranz BJ, Chen RE, Shi PY,  
798 Carnahan RH, Thackray LB, Diamond MS, Crowe JE, Jr. 2021. Neutralizing and  
799 protective human monoclonal antibodies recognizing the N-terminal domain of the  
800 SARS-CoV-2 spike protein. *Cell* 184:2316-2331 e15.
- 801 18. Wang N, Sun Y, Feng R, Wang Y, Guo Y, Zhang L, Deng YQ, Wang L, Cui Z, Cao L,  
802 Zhang YJ, Li W, Zhu FC, Qin CF, Wang X. 2021. Structure-based development of  
803 human antibody cocktails against SARS-CoV-2. *Cell Res* 31:101-103.
- 804 19. Shah P, Canziani GA, Carter EP, Chaiken I. 2021. The Case for S2: The Potential  
805 Benefits of the S2 Subunit of the SARS-CoV-2 Spike Protein as an Immunogen in  
806 Fighting the COVID-19 Pandemic. *Front Immunol* 12:637651.
- 807 20. Nguyen-Contant P, Embong AK, Kanagaiah P, Chaves FA, Yang H, Branche AR,  
808 Topham DJ, Sangster MY. 2020. S Protein-Reactive IgG and Memory B Cell Production  
809 after Human SARS-CoV-2 Infection Includes Broad Reactivity to the S2 Subunit. *mBio*  
810 11.
- 811 21. Steffen HA, Swartz SR, Jackson JB, Kenne KA, Ten Eyck PP, Merryman AS, Castaneda  
812 CN, Marsden K, Maxwell T, Merrill AE, Krasowski MD, Rysavy MB. 2021. SARS-CoV-2  
813 Infection during Pregnancy in a Rural Midwest All-delivery Cohort and Associated  
814 Maternal and Neonatal Outcomes. *Am J Perinatol* 38:614-621.
- 815 22. Salimi H, Johnson J, Flores MG, Zhang MS, O'Malley Y, Houtman JC, Schlievert PM,  
816 Haim H. 2020. The lipid membrane of HIV-1 stabilizes the viral envelope glycoproteins  
817 and modulates their sensitivity to antibody neutralization. *J Biol Chem* 295:348-362.

- 818 23. Johnson J, Flores MG, Rosa J, Han C, Salvi AM, DeMali KA, Jagnow JR, Sparks A,  
819 Haim H. 2020. The High Content of Fructose in Human Semen Competitively Inhibits  
820 Broad and Potent Antivirals That Target High-Mannose Glycans. *J Virol* 94.
- 821 24. Johnson J, Zhai Y, Salimi H, Espy N, Eichelberger N, DeLeon O, O'Malley Y, Courter J,  
822 Smith AB, 3rd, Madani N, Sodroski J, Haim H. 2017. Induction of a Tier-1-Like  
823 Phenotype in Diverse Tier-2 Isolates by Agents That Guide HIV-1 Env to Perturbation-  
824 Sensitive, Nonnative States. *J Virol* 91.
- 825 25. Amanat F, Thapa M, Lei T, Ahmed SMS, Adelsberg DC, Carreno JM, Strohmeier S,  
826 Schmitz AJ, Zafar S, Zhou JQ, Rijnink W, Alshammary H, Borchering N, Reiche AG,  
827 Srivastava K, Sordillo EM, van Bakel H, Personalized Virology I, Turner JS, Bajic G,  
828 Simon V, Ellebedy AH, Krammer F. 2021. The plasmablast response to SARS-CoV-2  
829 mRNA vaccination is dominated by non-neutralizing antibodies that target both the NTD  
830 and the RBD. medRxiv doi:10.1101/2021.03.07.21253098.
- 831 26. Liu L, Wang P, Nair MS, Yu J, Rapp M, Wang Q, Luo Y, Chan JF, Sahi V, Figueroa A,  
832 Guo XV, Cerutti G, Bimela J, Gorman J, Zhou T, Chen Z, Yuen KY, Kwong PD, Sodroski  
833 JG, Yin MT, Sheng Z, Huang Y, Shapiro L, Ho DD. 2020. Potent neutralizing antibodies  
834 against multiple epitopes on SARS-CoV-2 spike. *Nature* 584:450-456.
- 835 27. Jungbauer C, Weseslindtner L, Weidner L, Gansdorfer S, Farcet MR, Gschaidner-  
836 Reichhart E, Kreil TR. 2020. Characterization of 100 sequential SARS-CoV-2  
837 convalescent plasma donations. *Transfusion* doi:10.1111/trf.16119.
- 838 28. Brochet E, Demey B, Touze A, Belouzard S, Dubuisson J, Schmit JL, Duverlie G,  
839 Francois C, Castelain S, Helle F. 2020. Anti-spike, Anti-nucleocapsid and Neutralizing  
840 Antibodies in SARS-CoV-2 Inpatients and Asymptomatic Individuals. *Front Microbiol*  
841 11:584251.
- 842 29. Gniadek TJ, Thiede JM, Matchett WE, Gress AR, Pape KA, Fiege JK, Jenkins MK,  
843 Menachery VD, Langlois RA, Bold TD. 2020. SARS-CoV-2 neutralization and serology

- 844 testing of COVID-19 convalescent plasma from donors with nonsevere disease.  
845 Transfusion doi:10.1111/trf.16101.
- 846 30. Case JB, Rothlauf PW, Chen RE, Liu Z, Zhao H, Kim AS, Bloyet LM, Zeng Q, Tahan S,  
847 Droit L, Ilagan MXG, Tartell MA, Amarasinghe G, Henderson JP, Miersch S, Ustav M,  
848 Sidhu S, Virgin HW, Wang D, Ding S, Corti D, Theel ES, Fremont DH, Diamond MS,  
849 Whelan SPJ. 2020. Neutralizing Antibody and Soluble ACE2 Inhibition of a Replication-  
850 Competent VSV-SARS-CoV-2 and a Clinical Isolate of SARS-CoV-2. *Cell Host Microbe*  
851 28:475-485 e5.
- 852 31. Klein SL, Pekosz A, Park HS, Ursin RL, Shapiro JR, Benner SE, Littlefield K, Kumar S,  
853 Naik HM, Betenbaugh MJ, Shrestha R, Wu AA, Hughes RM, Burgess I, Caturegli P,  
854 Laeyendecker O, Quinn TC, Sullivan D, Shoham S, Redd AD, Bloch EM, Casadevall A,  
855 Tobian AA. 2020. Sex, age, and hospitalization drive antibody responses in a COVID-19  
856 convalescent plasma donor population. *J Clin Invest* 130:6141-6150.
- 857 32. Berger Rentsch M, Zimmer G. 2011. A vesicular stomatitis virus replicon-based bioassay  
858 for the rapid and sensitive determination of multi-species type I interferon. *PLoS One*  
859 6:e25858.
- 860 33. Muecksch F, Wise H, Batchelor B, Squires M, Semple E, Richardson C, McGuire J,  
861 Clearly S, Furrie E, Greig N, Hay G, Templeton K, Lorenzi JCC, Hatzioannou T, Jenks  
862 S, Bieniasz PD. 2021. Longitudinal Serological Analysis and Neutralizing Antibody  
863 Levels in Coronavirus Disease 2019 Convalescent Patients. *J Infect Dis* 223:389-398.
- 864 34. Patel EU, Bloch EM, Clarke W, Hsieh YH, Boon D, Eby Y, Fernandez RE, Baker OR,  
865 Keruly M, Kirby CS, Klock E, Littlefield K, Miller J, Schmidt HA, Sullivan P, Piwowar-  
866 Manning E, Shrestha R, Redd AD, Rothman RE, Sullivan D, Shoham S, Casadevall A,  
867 Quinn TC, Pekosz A, Tobian AAR, Laeyendecker O. 2021. Comparative Performance of  
868 Five Commercially Available Serologic Assays To Detect Antibodies to SARS-CoV-2  
869 and Identify Individuals with High Neutralizing Titers. *J Clin Microbiol* 59.

- 870 35. Tang MS, Case JB, Franks CE, Chen RE, Anderson NW, Henderson JP, Diamond MS,  
871 Gronowski AM, Farnsworth CW. 2020. Association between SARS-CoV-2 neutralizing  
872 antibodies and commercial serological assays. *Clin Chem*  
873 doi:10.1093/clinchem/hvaa211.
- 874 36. Niu L, Wittrock KN, Clabaugh GC, Srivastava V, Cho MW. 2021. A Structural Landscape  
875 of Neutralizing Antibodies Against SARS-CoV-2 Receptor Binding Domain. *Front*  
876 *Immunol* 12:647934.
- 877 37. Seydoux E, Homad LJ, MacCamy AJ, Parks KR, Hurlburt NK, Jennewein MF, Akins NR,  
878 Stuart AB, Wan YH, Feng J, Whaley RE, Singh S, Boeckh M, Cohen KW, McElrath MJ,  
879 Englund JA, Chu HY, Pancera M, McGuire AT, Stamatatos L. 2020. Analysis of a SARS-  
880 CoV-2-Infected Individual Reveals Development of Potent Neutralizing Antibodies with  
881 Limited Somatic Mutation. *Immunity* 53:98-105 e5.
- 882 38. Amanat F, Thapa M, Lei T, Ahmed SMS, Adelsberg DC, Carreno JM, Strohmeier S,  
883 Schmitz AJ, Zafar S, Zhou JQ, Rijnink W, Alshammary H, Borchering N, Reiche AG,  
884 Srivastava K, Sordillo EM, van Bakel H, Personalized Virology I, Turner JS, Bajic G,  
885 Simon V, Ellebedy AH, Krammer F. 2021. SARS-CoV-2 mRNA vaccination induces  
886 functionally diverse antibodies to NTD, RBD, and S2. *Cell*  
887 doi:10.1016/j.cell.2021.06.005.
- 888 39. Collier DA, De Marco A, Ferreira I, Meng B, Datir RP, Walls AC, Kemp SA, Bassi J,  
889 Pinto D, Silacci-Fregni C, Bianchi S, Tortorici MA, Bowen J, Culap K, Jaconi S,  
890 Cameroni E, Snell G, Pizzuto MS, Pellanda AF, Garzoni C, Riva A, Collaboration C-  
891 NBC-, Elmer A, Kingston N, Graves B, McCoy LE, Smith KGC, Bradley JR, Temperton  
892 N, Ceron-Gutierrez L, Barcenas-Morales G, Consortium C-GU, Harvey W, Virgin HW,  
893 Lanzavecchia A, Piccoli L, Doffinger R, Wills M, Veessler D, Corti D, Gupta RK. 2021.  
894 Sensitivity of SARS-CoV-2 B.1.1.7 to mRNA vaccine-elicited antibodies. *Nature*  
895 593:136-141.

- 896 40. Voss WN, Hou YJ, Johnson NV, Delidakis G, Kim JE, Javanmardi K, Horton AP,  
897 Bartzoka F, Paresi CJ, Tanno Y, Chou CW, Abbasi SA, Pickens W, George K, Boutz  
898 DR, Towers DM, McDaniel JR, Billick D, Goike J, Rowe L, Batra D, Pohl J, Lee J,  
899 Gangappa S, Sambhara S, Gadush M, Wang N, Person MD, Iverson BL, Gollihar JD,  
900 Dye JM, Herbert AS, Finkelstein IJ, Baric RS, McLellan JS, Georgiou G, Lavinder JJ,  
901 Ippolito GC. 2021. Prevalent, protective, and convergent IgG recognition of SARS-CoV-2  
902 non-RBD spike epitopes. *Science* 372:1108-1112.
- 903 41. Jaaskelainen AJ, Kuivanen S, Kekalainen E, Ahava MJ, Loginov R, Kallio-Kokko H,  
904 Vapalahti O, Jarva H, Kurkela S, Lappalainen M. 2020. Performance of six SARS-CoV-2  
905 immunoassays in comparison with microneutralisation. *J Clin Virol* 129:104512.
- 906 42. Luchsinger LL, Ransegnola B, Jin D, Muecksch F, Weisblum Y, Bao W, George PJ,  
907 Rodriguez M, Tricoche N, Schmidt F, Gao C, Jawahar S, Pal M, Schnall E, Zhang H,  
908 Strauss D, Yazdanbakhsh K, Hillyer CD, Bieniasz PD, Hatziioannou T. 2020. Serological  
909 Assays Estimate Highly Variable SARS-CoV-2 Neutralizing Antibody Activity in  
910 Recovered COVID19 Patients. *J Clin Microbiol* doi:10.1128/JCM.02005-20.
- 911 43. Grenache DG, Ye C, Bradfute SB. 2020. Correlation of SARS-CoV-2 neutralizing  
912 antibodies to an automated chemiluminescent serological immunoassay. *J Appl Lab*  
913 *Med* doi:10.1093/jalm/jfaa195.
- 914 44. Rychert J, Couturier MR, Elgort M, Lozier BK, La'ulu S, Genzen JR, Straseski JA,  
915 Delgado JC, Slev PR. 2020. Evaluation of Three SARS CoV-2 IgG Antibody Assays and  
916 Correlation with Neutralizing Antibodies. *J Appl Lab Med* doi:10.1093/jalm/jfaa188.
- 917 45. Haim H, Salas I, Sodroski J. 2013. Proteolytic processing of the human  
918 immunodeficiency virus envelope glycoprotein precursor decreases conformational  
919 flexibility. *J Virol* 87:1884-9.



920 46. Cervera L, Gonzalez-Dominguez I, Segura MM, Godia F. 2017. Intracellular  
921 characterization of Gag VLP production by transient transfection of HEK 293 cells.  
922 Biotechnol Bioeng 114:2507-2517.

923

# Figure 1

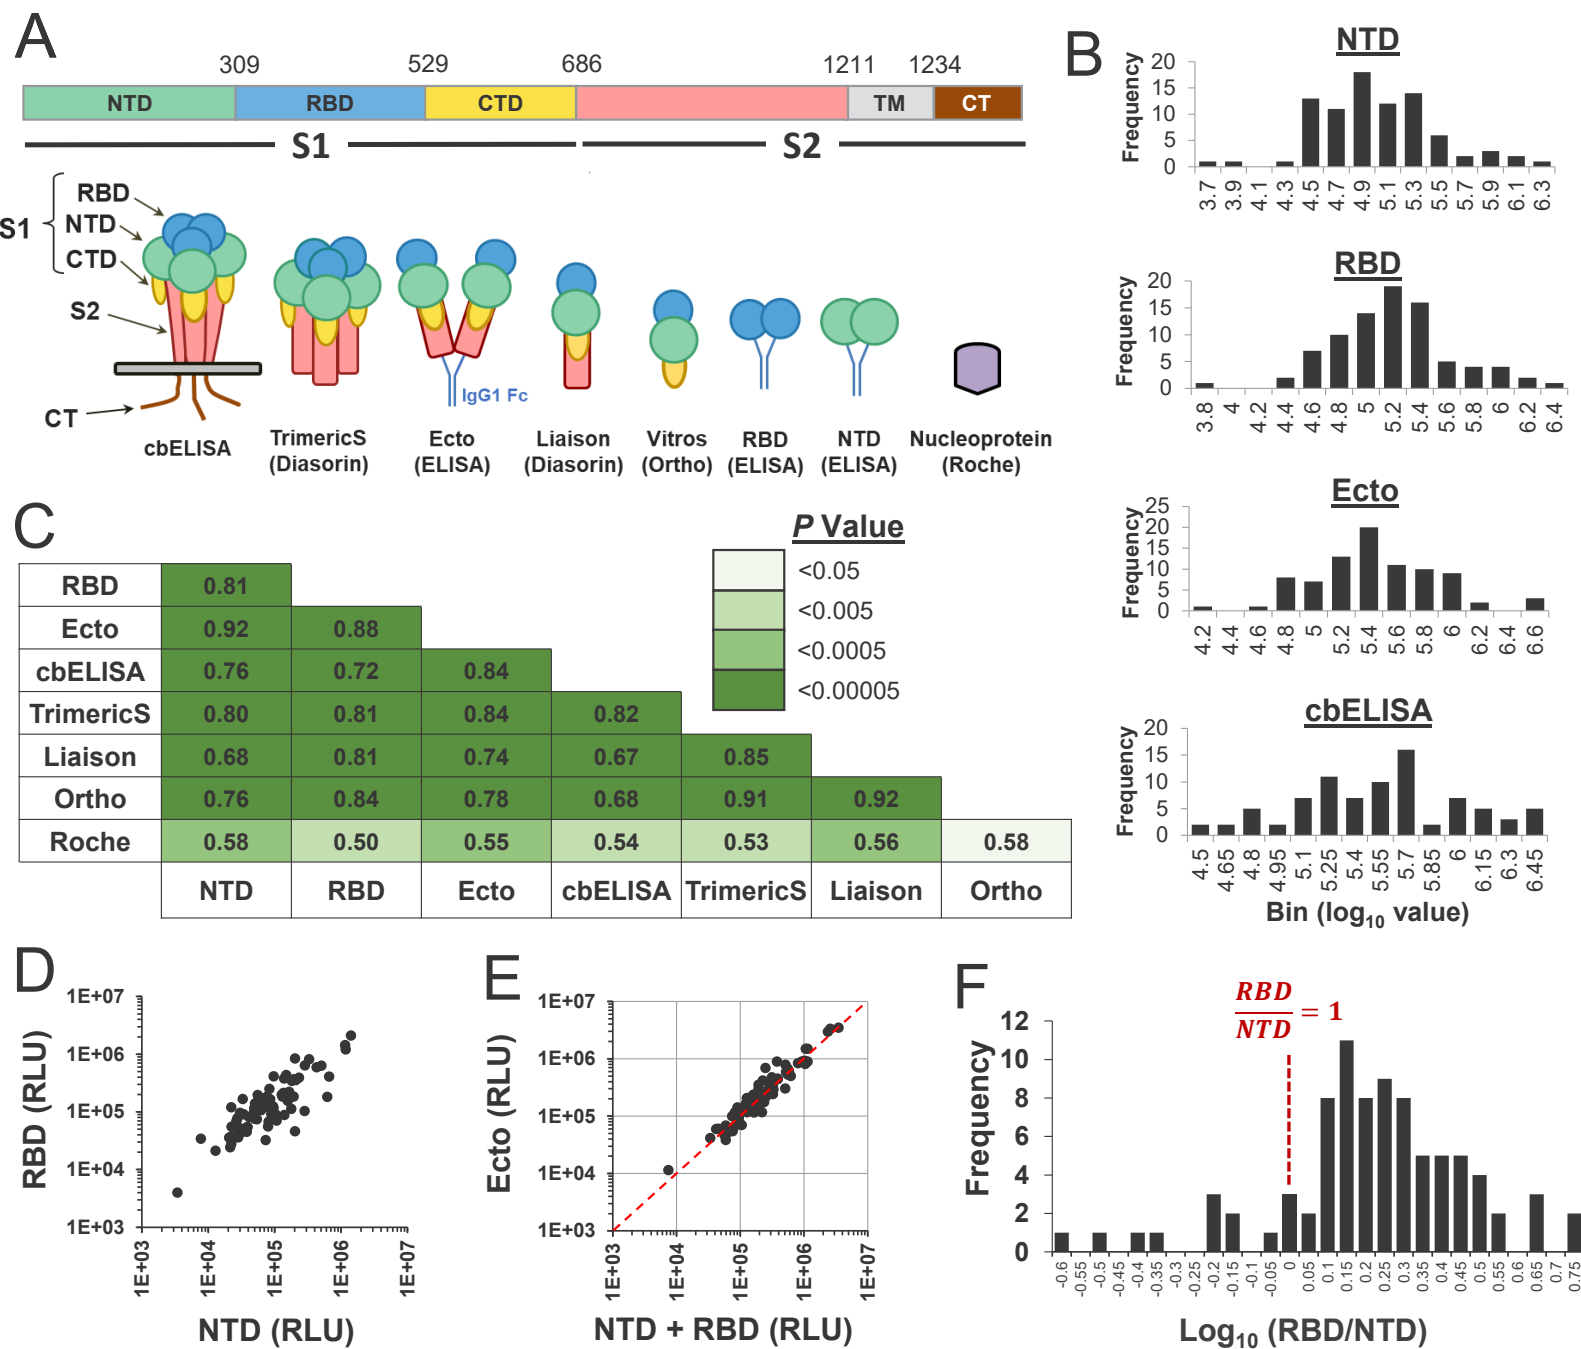

## Figure 2

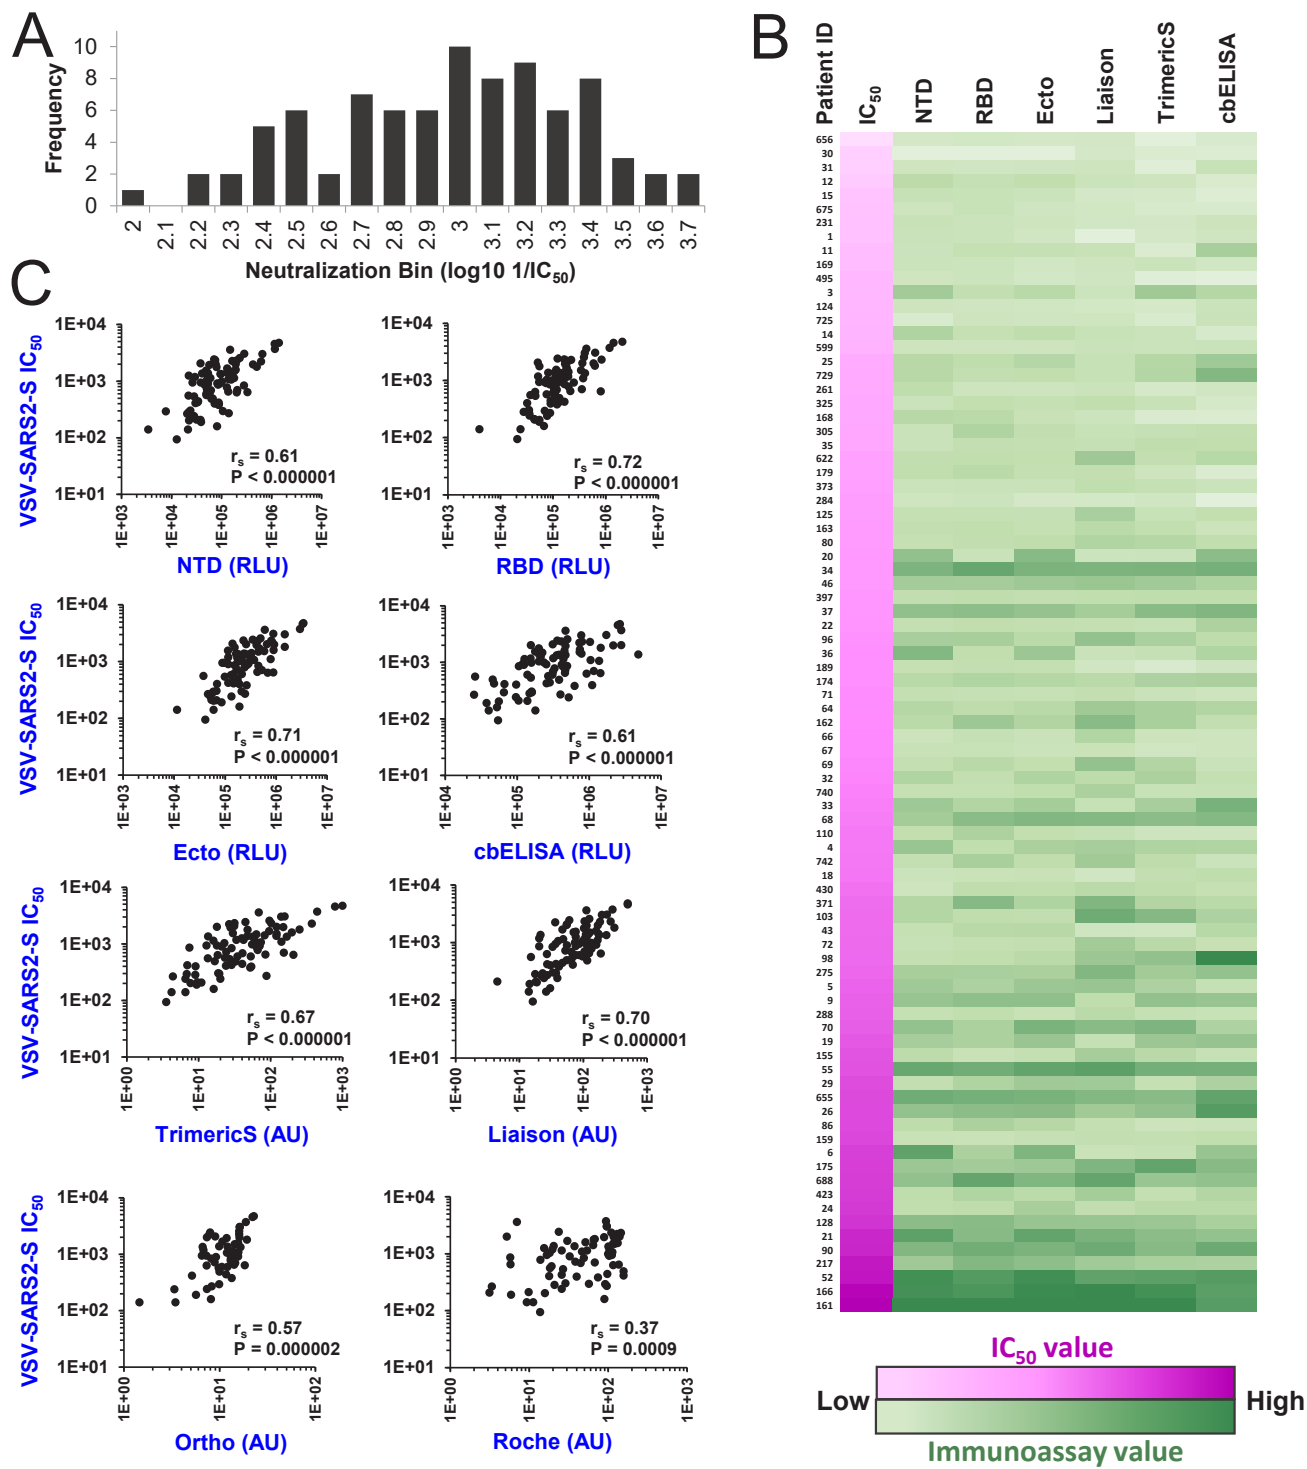

### Figure 3

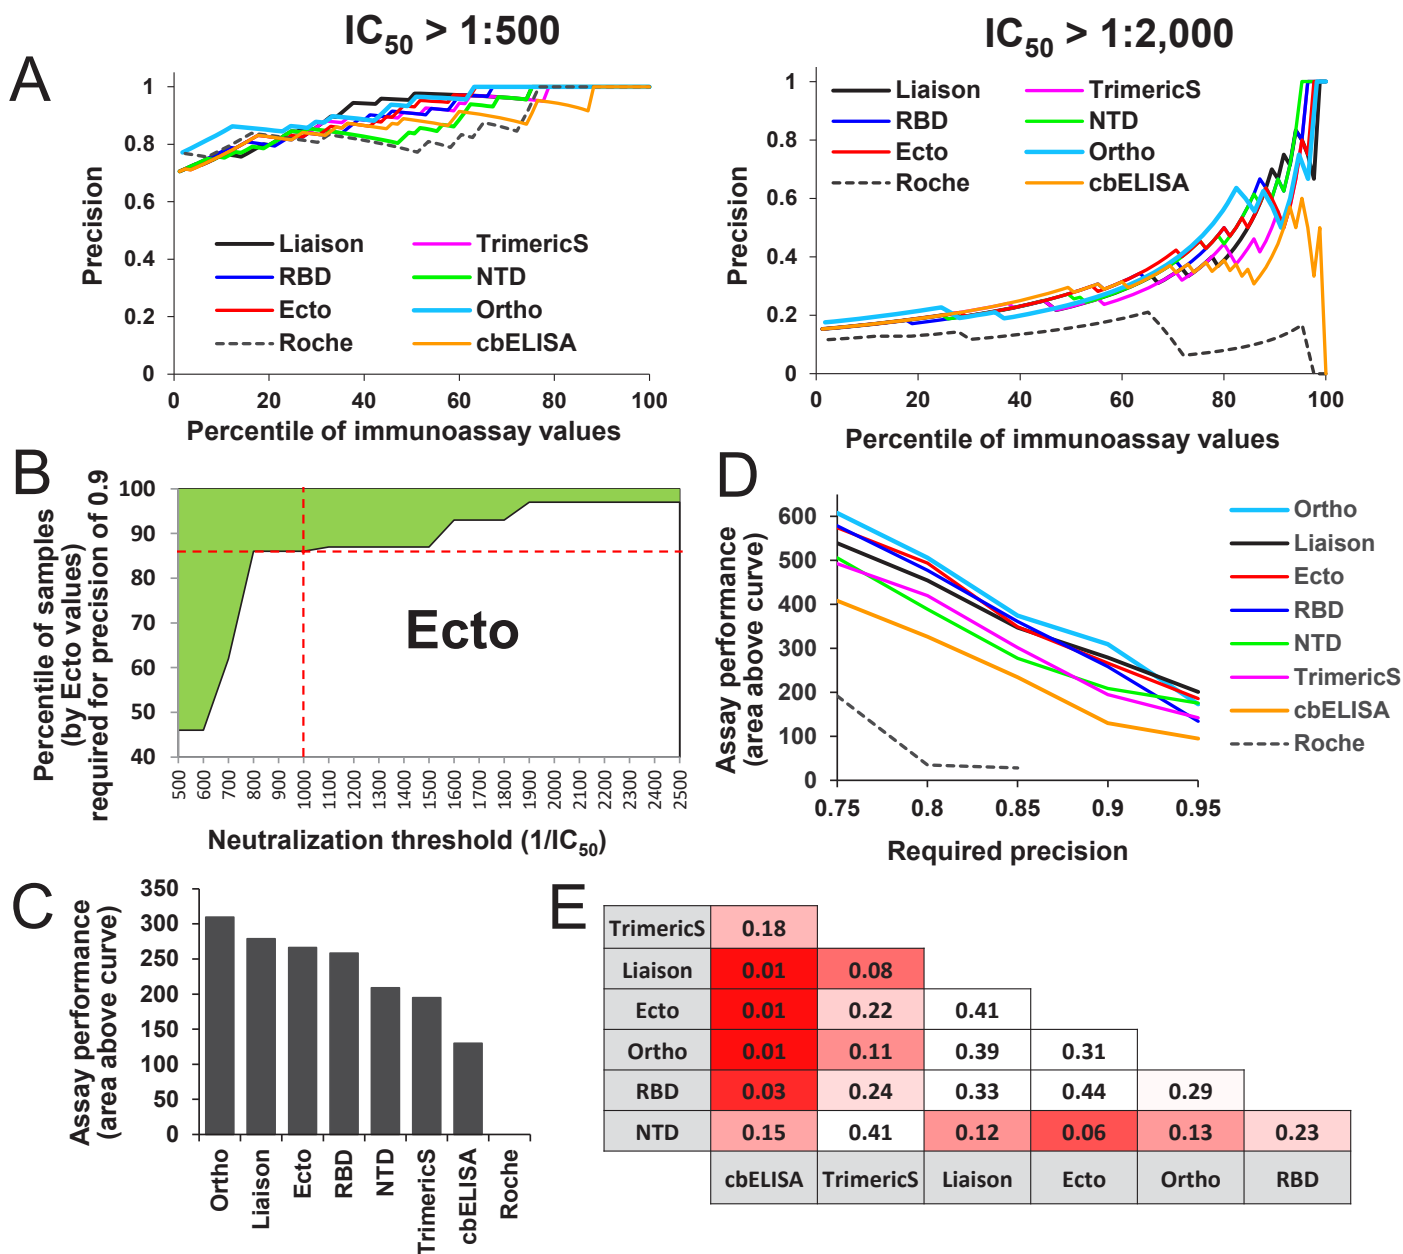

# Figure 4

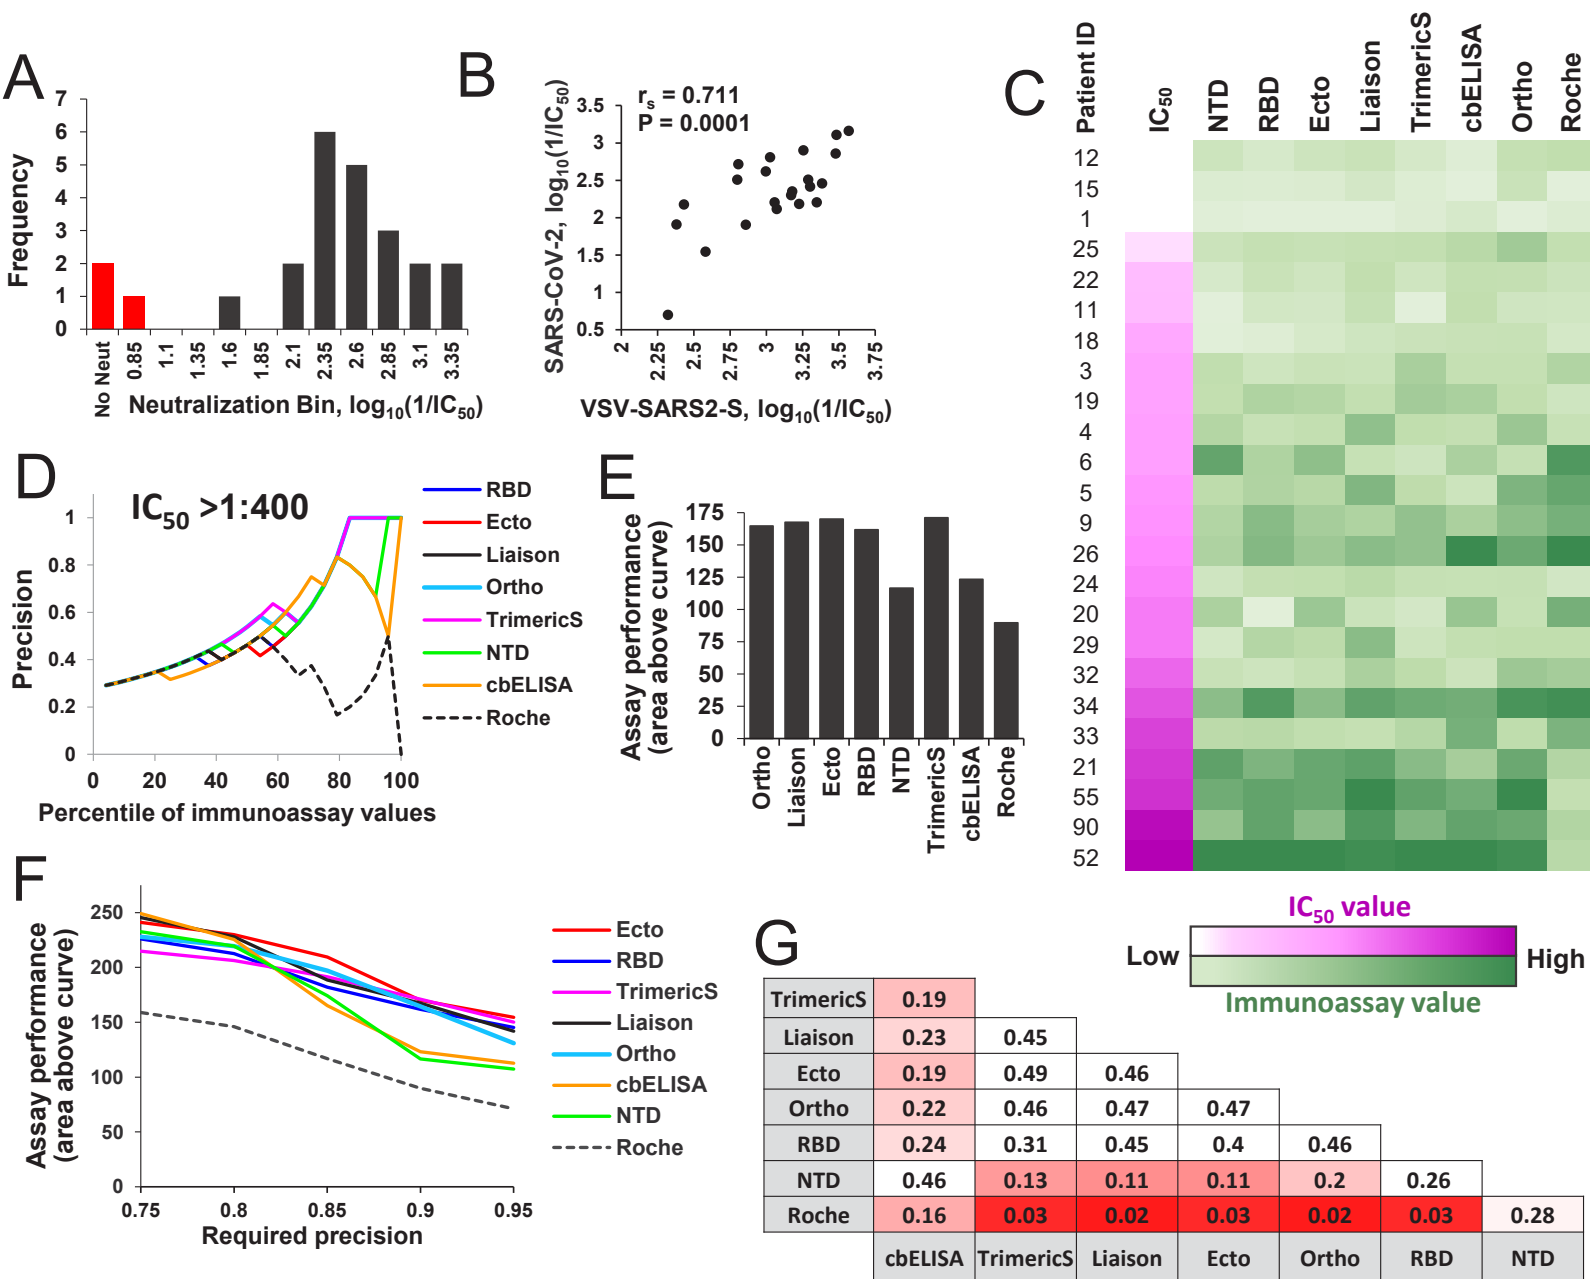

**Figure 5**

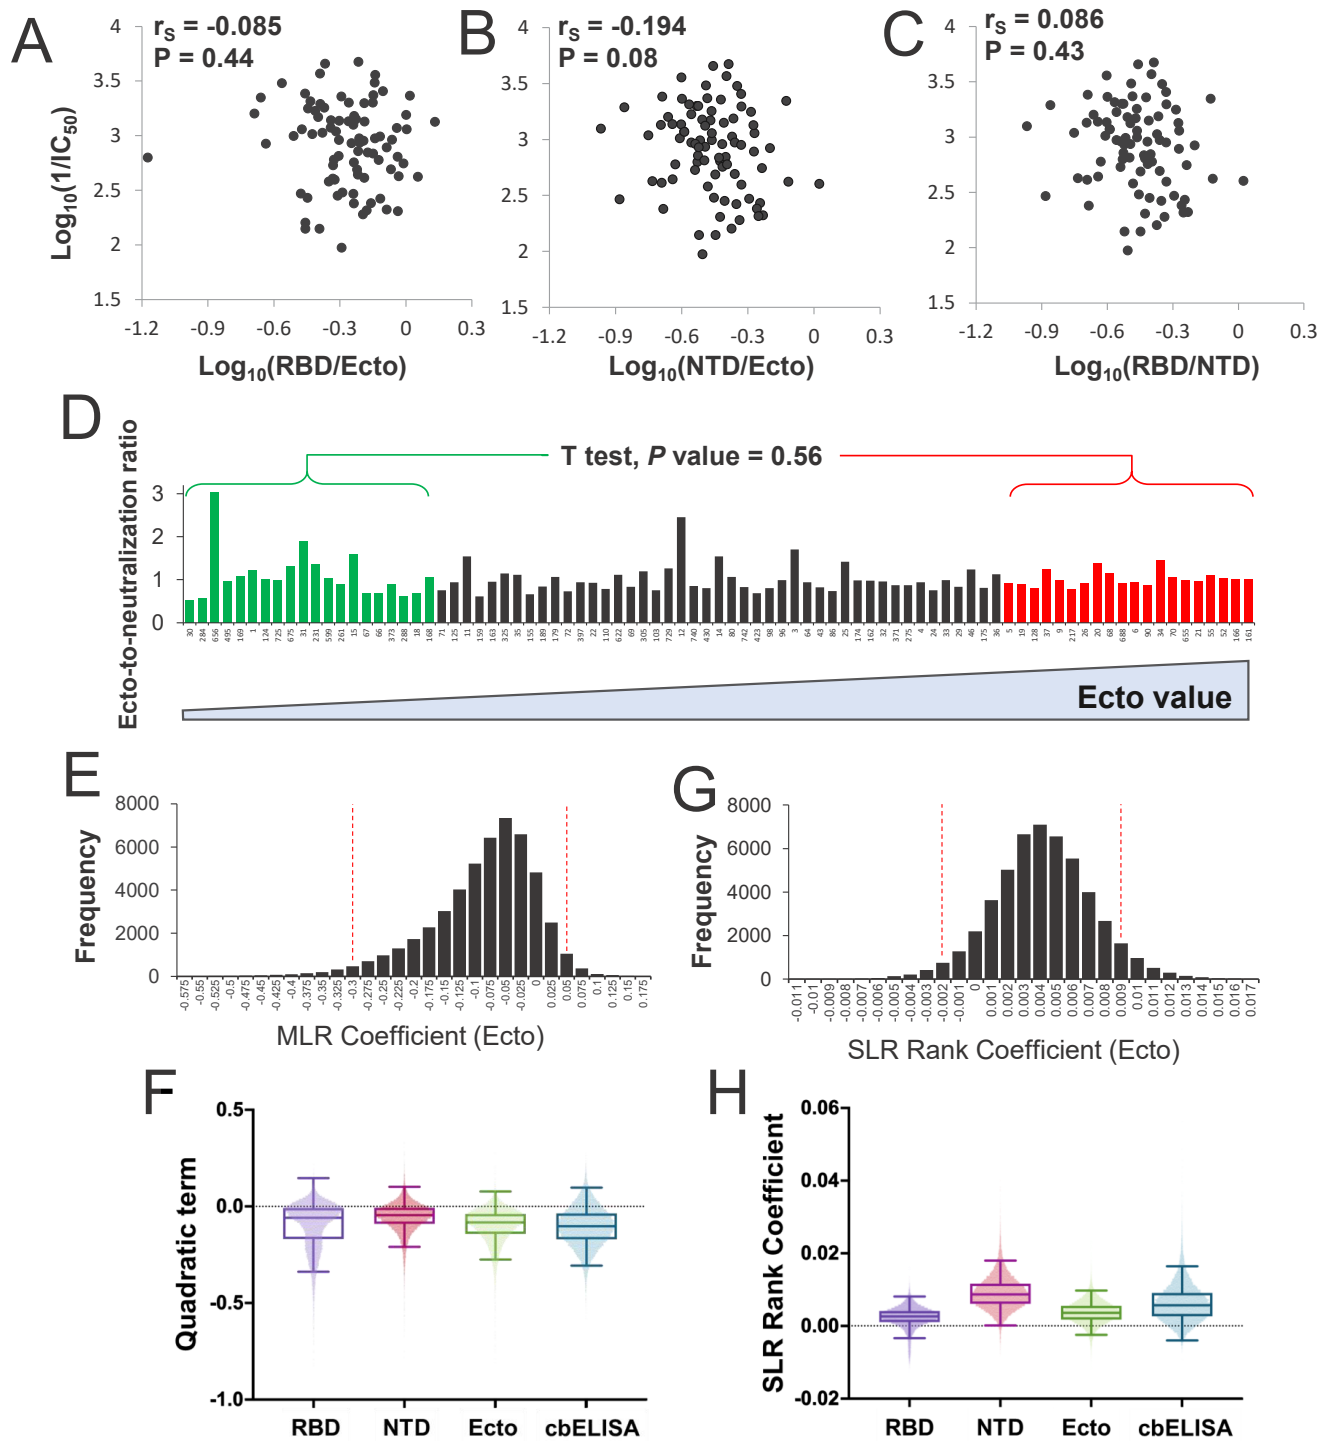

# Figure 6

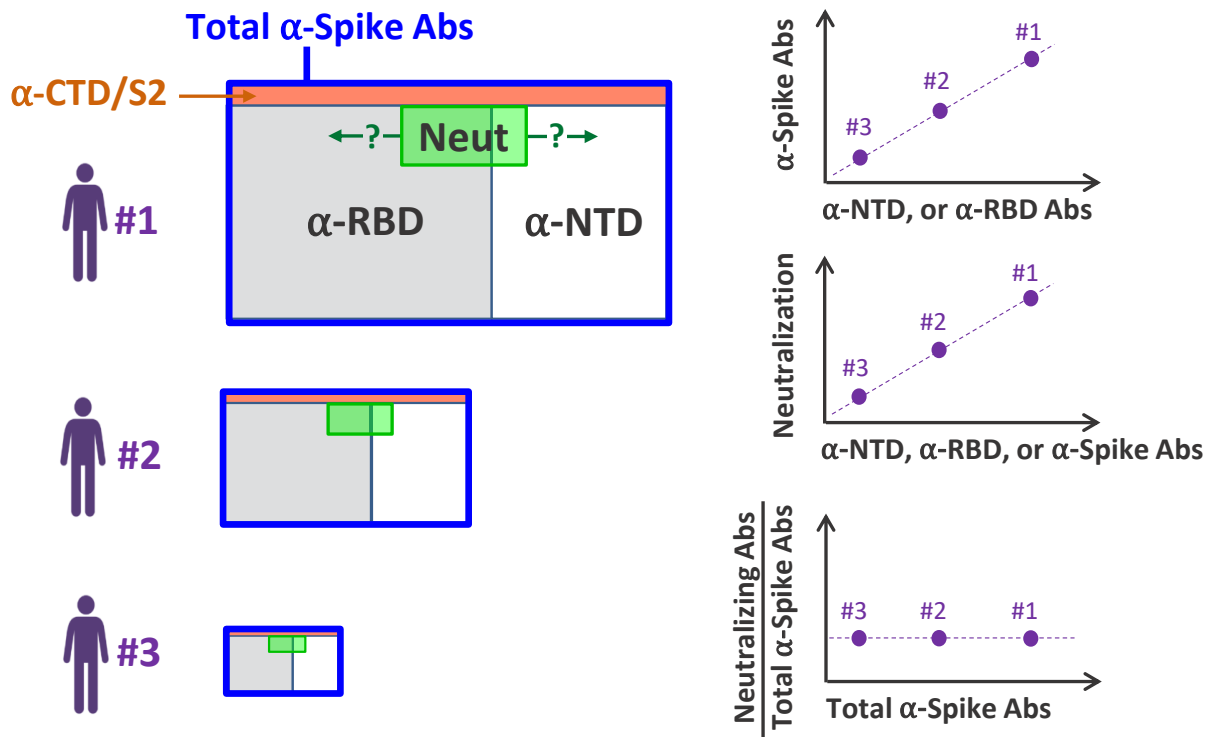

# Supplemental Figure S1

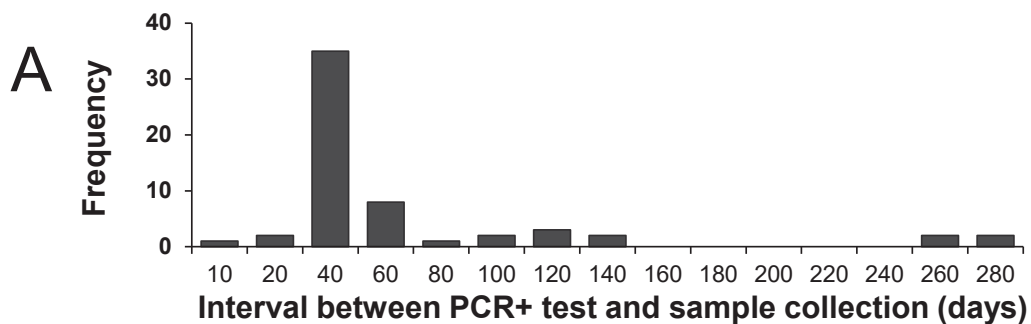

**B**

|           | <i>P</i> value | <i>P</i> value for $\log_{10}$ -transformed data |
|-----------|----------------|--------------------------------------------------|
| NTD       | <0.0001        | 0.11                                             |
| RBD       | <0.0001        | 0.08                                             |
| Ecto      | <0.0001        | 0.29                                             |
| Liaison   | <0.0001        | 0.56                                             |
| Ortho     | 0.82           | <0.0001                                          |
| TrimericS | <0.0001        | 0.67                                             |
| Roche     | <0.0001        | <0.0001                                          |
| cbELISA   | <0.0001        | 0.76                                             |

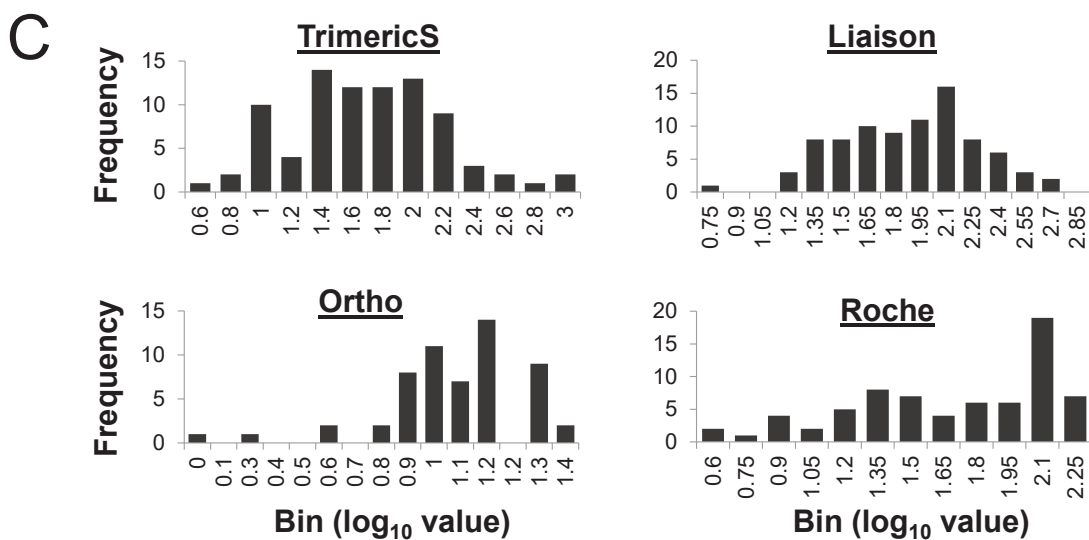



Supplemental Figure S2

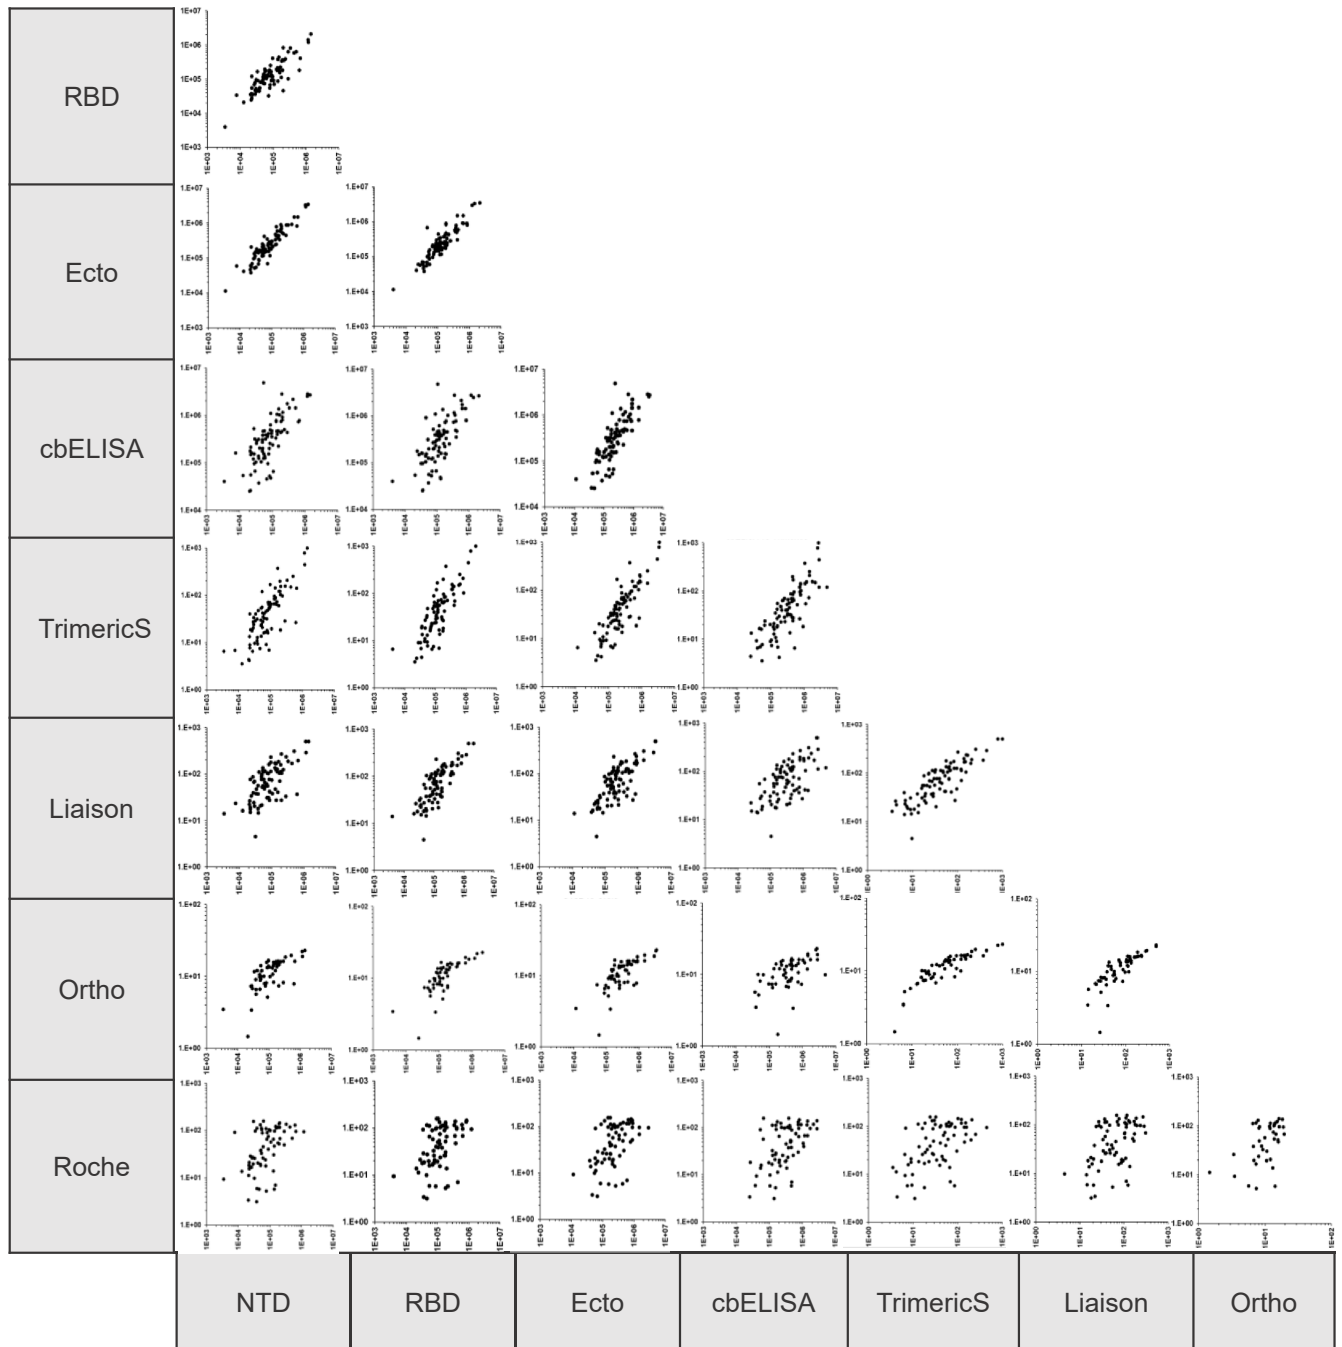

# Supplemental Figure S3

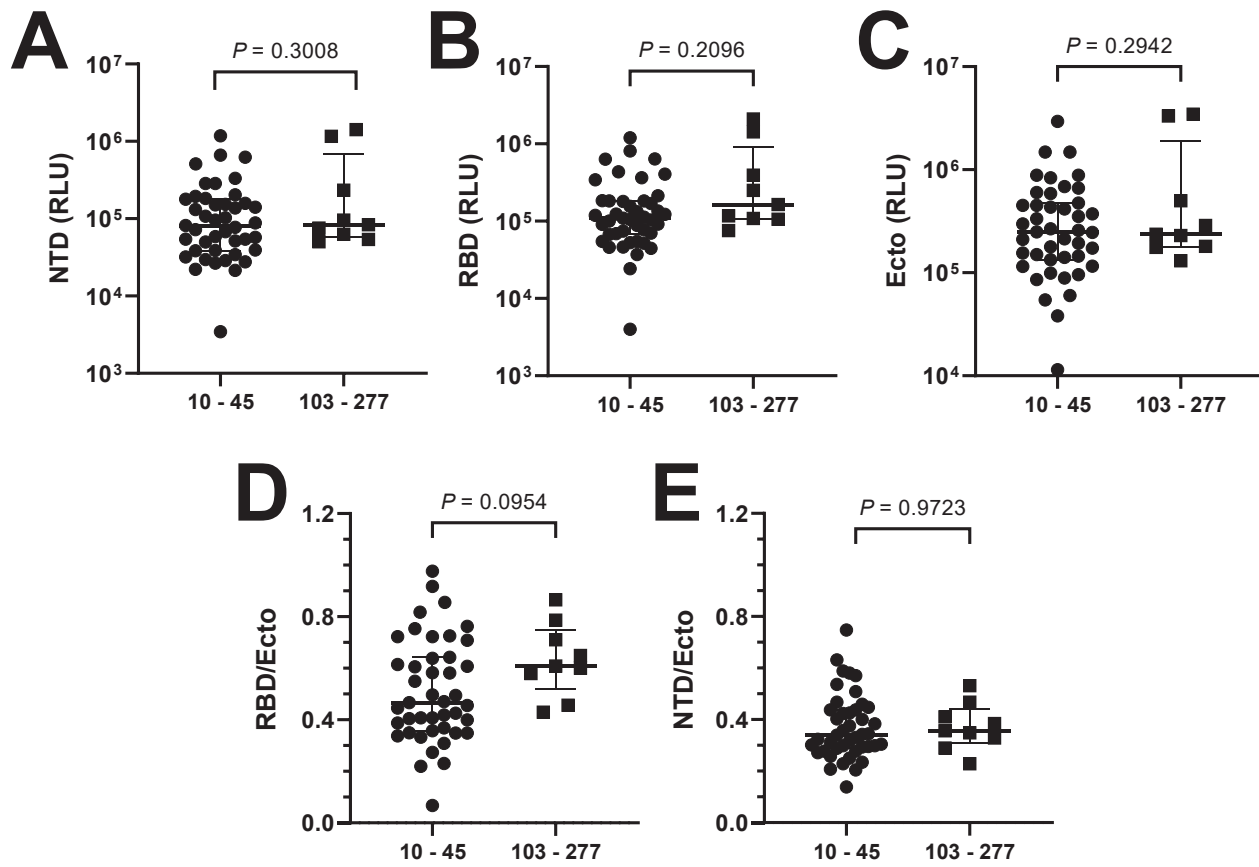

# Supplemental Figure S4

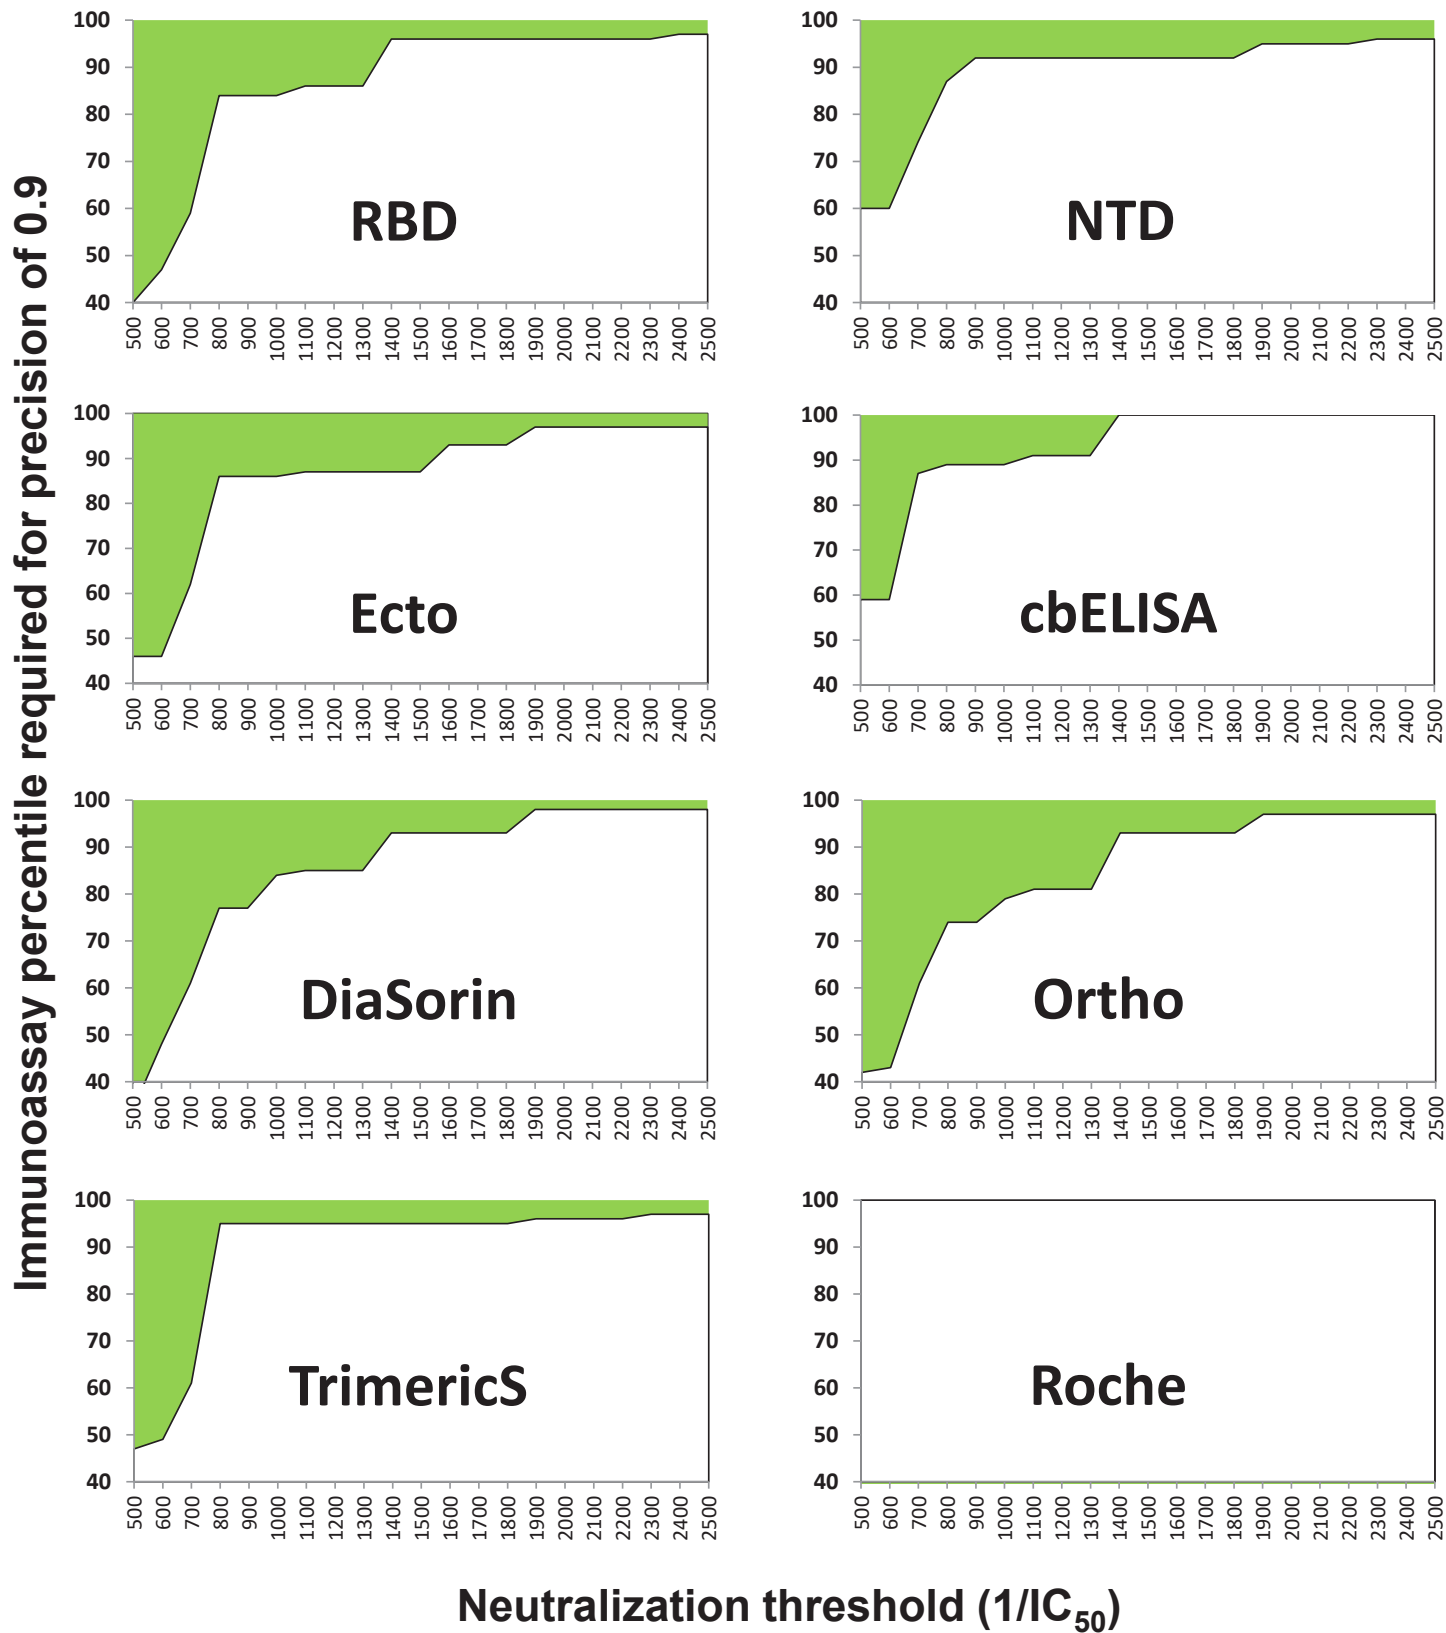

# Supplemental Figure S5

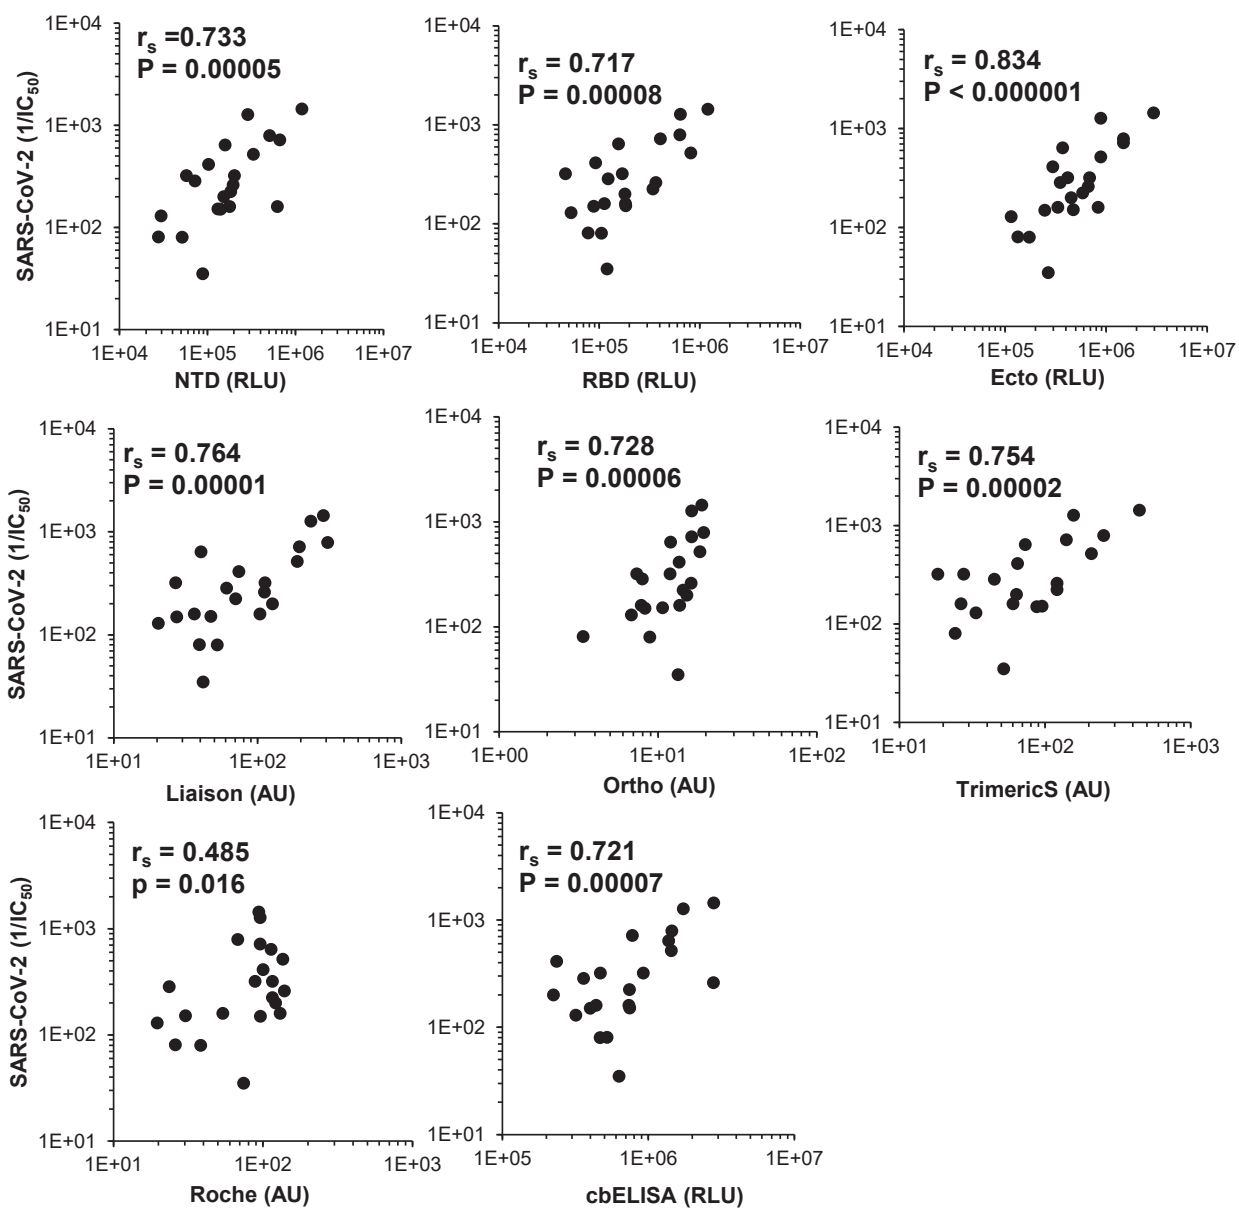

# Supplemental Figure S6

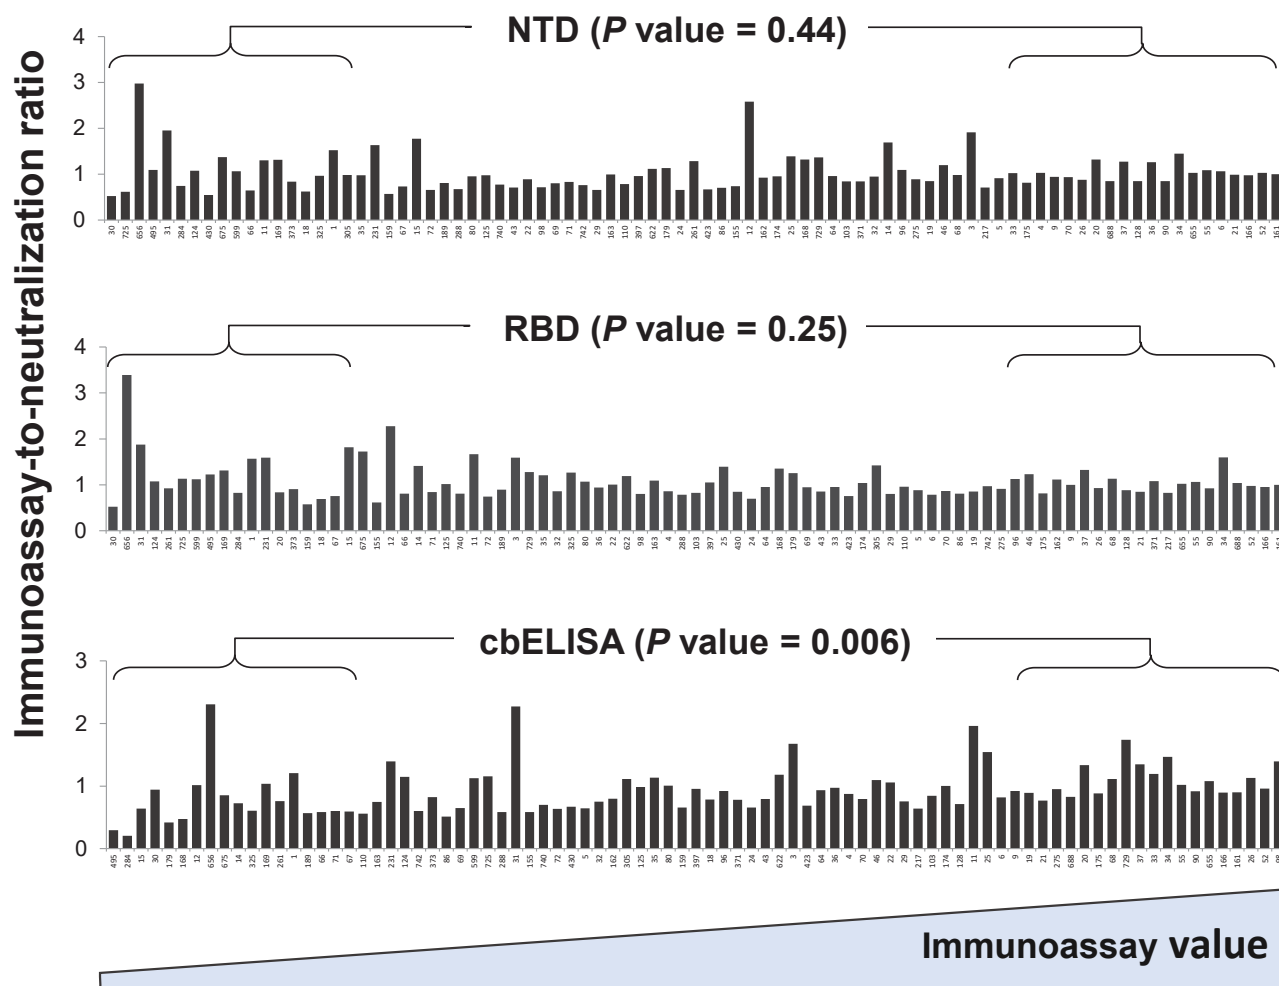

Source: http://biorxiv.org/content/10.1101/2021.08.04.455181v1.full.pdf
